# Supplementary material
Source: PubMed Central journal article supplement (PMC6459216)

## Supplementary Online Content

Kjaer TK, Wreford Andersen EA, Winther JF, et al. Long-term somatic disease risk in adult Danish cancer survivors. *JAMA Oncol*. Published online March 7, 2010. doi:10.1001/jamaoncol.2018.7192

**eTable 1.** Descriptive statistics of the study participants

**eTable 2.** Results of Cox models for the effect of the 12 most frequent cancer types (exposed) as compared with cancer-free comparisons (unexposed) on the incidence of somatic disease

**eFigure 1.** Adjusted HRs and 95% CIs for hospitalization for somatic diseases in the 11 main ICD-10 diagnostic groups in Danish survivors of malignant melanoma, bladder, rectum and brain cancer and cancer-free matched comparison people

**eFigure 2.** Adjusted HRs and 95% CIs for hospitalization for somatic diseases in the 11 main ICD-10 diagnostic groups in Danish survivors of non-Hodgkin lymphoma, pancreas and kidney cancer and leukemia and cancer-free matched comparison people.

**eFigure 3.** Adjusted cumulative incidence risk difference and 95% CIs for hospitalization five years after diagnosis for somatic disease in the 11 main ICD-10 diagnostic groups among Danish survivors of malignant melanoma, bladder, rectum and brain cancer and cancer-free matched comparison people.

**eFigure 4.** Adjusted cumulative incidence risk difference and 95% CIs for hospitalization five years after diagnosis for somatic disease in the 11 main ICD-10 diagnostic groups among Danish survivors of non-Hodgkin lymphoma, pancreas and kidney cancer and leukemia and cancer-free matched comparison people.

**eFigure 5.** Adjusted HRs and 95% CIs for hospitalization for new primary cancers among Danish survivors of malignant melanoma, bladder, rectum, and brain cancer, non-Hodgkin lymphoma, pancreas and kidney cancer and leukemia and matched cancer-free comparison people.

**eFigure 6.** Adjusted HRs and 95% CIs for hospitalization for infectious and parasitic diseases among Danish survivors of malignant melanoma, bladder, rectum, and brain cancer, non-Hodgkin lymphoma, pancreas and kidney cancer and leukemia and matched cancer-free comparison people.

**eFigure 7.** Adjusted HRs and 95% CIs for hospitalization of survivors of the 12 most frequent cancer types for diseases of the blood and blood-forming organs as compared with matched cancer-free comparison people.

**eFigure 8.** Adjusted HRs and 95% CIs for hospitalization of survivors of the 12 most frequent cancer types for endocrine, nutritional and metabolic diseases as compared with matched cancer-free comparison people.

**eFigure 9.** Adjusted HRs and 95% CIs for hospitalization of survivors of the 12 most frequent cancer types for diseases of the nervous system and senses organs as compared with matched cancer-free comparison people.

**eFigure 10.** Adjusted HRs and 95% CIs for hospitalization of survivors of the 12 most frequent cancer types for diseases of the circulatory system as compared with matched cancer-free comparison people.

**eFigure 11.** Adjusted HRs and 95% CIs for hospitalization of survivors of the 12 most frequent cancer types for diseases of the respiratory system as compared with matched cancer-free comparison people.

**eFigure 12.** Adjusted HRs and 95% CIs for hospitalization of survivors of the 12 most frequent cancer types for diseases of the digestive system as compared with matched cancer-free comparison people.

**eFigure 13.** Adjusted HRs and 95% CIs for hospitalization of survivors of the 12 most frequent cancer types for diseases of the skin and subcutaneous tissue as compared with matched cancer-free comparison people.

**eFigure 14.** Adjusted HRs and 95% CIs for hospitalization of survivors of the 12 most frequent cancer types for diseases of the musculoskeletal system and connective tissue as compared with matched cancer-free comparison people.

**eFigure 15.** Adjusted HRs and 95% CIs for hospitalization of survivors of the 12 most frequent cancer types for diseases of the genitourinary system as compared with matched cancer-free comparison people.

**This supplementary material has been provided by the authors to give readers additional information about their work.**

**eTable 1. Descriptive statistics of the study participants**

|                                                        | Cancer-free comparison group <sup>a</sup> | Cancer survivors | All              | p      |
|--------------------------------------------------------|-------------------------------------------|------------------|------------------|--------|
|                                                        | n (%)                                     | n (%)            | n (%)            |        |
| <b>Total</b>                                           | 2,121,567                                 | 458,646          | 2,580,213        | <0.001 |
| <b>Sex</b>                                             |                                           |                  |                  |        |
| Male                                                   | 1,054,465 (49.7)                          | 230,793 (50.3)   | 1,285,258 (49.8) |        |
| Female                                                 | 1,067,102 (50.3)                          | 227,853 (49.7)   | 1,294,955 (50.2) |        |
| <b>Period of entry</b>                                 |                                           |                  |                  |        |
| 1998–2001                                              | 414,344 (19.5)                            | 87,068 (19.0)    | 501,412 (19.4)   | <0.001 |
| 2002–2004                                              | 324,741 (15.3)                            | 68,962 (15.0)    | 393,703 (15.3)   |        |
| 2005–2008                                              | 472,781 (22.3)                            | 101,846 (22.2)   | 574,627 (22.3)   |        |
| 2009–2011                                              | 388,865 (18.3)                            | 84,989 (18.5)    | 473,854 (18.4)   |        |
| 2012–2014                                              | 520,836 (24.5)                            | 115,781 (25.2)   | 636,617 (24.7)   |        |
| <b>Age at entry (years)</b>                            |                                           |                  |                  |        |
| 40–49                                                  | 131,874 (6.2)                             | 30,854 (6.7)     | 162,728 (6.3)    | <0.001 |
| 50–59                                                  | 336,507 (15.9)                            | 75,803 (16.5)    | 412,310 (16.0)   |        |
| 60–69                                                  | 610,926 (28.8)                            | 132,721 (28.9)   | 743,647 (28.8)   |        |
| 70–79                                                  | 634,433 (29.9)                            | 134,006 (29.2)   | 768,439 (29.8)   |        |
| ≥ 80                                                   | 407,827 (19.2)                            | 85,262 (18.6)    | 493,089 (19.1)   |        |
| <b>Marital status</b>                                  |                                           |                  |                  |        |
| Married/Partner                                        | 1,293,927 (61.0)                          | 274,897 (59.9)   | 1,568,824 (60.8) | <0.001 |
| Divorced/Widow/Unmarried                               | 812,889 (38.3)                            | 183,410 (40.0)   | 996,299 (38.6)   |        |
| Missing                                                | 14,751 (0.7)                              | 339 (0.1)        | 15,090 (0.6)     |        |
| <b>Charlson comorbidity score at entry<sup>b</sup></b> |                                           |                  |                  |        |
| 0                                                      | 1,851,793 (87.3)                          | 372,584 (81.2)   | 2,224,377 (86.2) | <0.001 |
| 1                                                      | 184,683 (8.7)                             | 56,596 (12.3)    | 241,279 (9.4)    |        |
| ≥ 2                                                    | 85,091 (4.0)                              | 29,466 (6.4)     | 114,557 (4.4)    |        |
| <b>Education<sup>c</sup></b>                           |                                           |                  |                  |        |
| Higher                                                 | 370,116 (17.4)                            | 76,894 (16.8)    | 447,010 (17.3)   | <0.001 |
| Medium                                                 | 867,673 (40.9)                            | 195,066 (42.5)   | 1,062,739 (41.2) |        |
| Short                                                  | 646,622 (30.5)                            | 140,235 (30.6)   | 786,857 (30.5)   |        |
| Data missing                                           | 237,156 (11.2)                            | 46,451 (10.1)    | 283,607 (11.0)   |        |
| <b>Income quintile<sup>d</sup></b>                     |                                           |                  |                  |        |
| 1                                                      | 411,118 (19.4)                            | 93,956 (20.5)    | 505,074 (19.6)   | <0.001 |
| 2                                                      | 436,034 (20.6)                            | 96,214 (21.0)    | 532,248 (20.6)   |        |
| 3                                                      | 429,445 (20.2)                            | 90,438 (19.7)    | 519,883 (20.1)   |        |
| 4                                                      | 419,144 (19.8)                            | 87,756 (19.1)    | 506,900 (19.6)   |        |
| 5                                                      | 414,051 (19.5)                            | 90,134 (19.7)    | 504,185 (19.5)   |        |

|                                  |              |              |              |        |
|----------------------------------|--------------|--------------|--------------|--------|
| Data missing                     | 11,775 (0.6) | 148 (0.0)    | 11,923 (0.5) |        |
|                                  |              |              |              |        |
| <b>Comorbidities at entry</b>    |              |              |              |        |
| Myocardial infarction            | 27,607 (1.3) | 7,064 (1.5)  | 34,671 (1.3) | <0.001 |
| Congestive heart failure         | 25,928 (1.2) | 6,937 (1.5)  | 32,865 (1.3) | <0.001 |
| Peripheral vascular disease      | 34,897 (1.6) | 11,185 (2.4) | 46,082 (1.8) | <0.001 |
| Cerebrovascular disease          | 61,928 (2.9) | 16,484 (3.6) | 78,412 (3.0) | <0.001 |
| Dementia                         | 11,523 (0.5) | 1,931 (0.4)  | 13,454 (0.5) | <0.001 |
| Chronic pulmonary disease        | 49,267 (2.3) | 16,144 (3.5) | 65,411 (2.5) | <0.001 |
| Connective tissue disease        | 21,313 (1.0) | 5,798 (1.3)  | 27,111 (1.1) | <0.001 |
| Ulcer disease                    | 17,517 (0.8) | 7,070 (1.5)  | 24,587 (1.0) | <0.001 |
| Mild liver disease               | 3,797 (0.2)  | 2,261 (0.5)  | 6,058 (0.2)  | <0.001 |
| Diabetes                         | 24,519 (1.2) | 7,041 (1.5)  | 31,560 (1.2) | <0.001 |
| Hemiplegia                       | 922 (0.0)    | 318 (0.1)    | 1,240 (0.1)  | <0.001 |
| Moderate to severe renal disease | 10,561 (0.5) | 4,439 (1.0)  | 15,000 (0.6) | <0.001 |
| Diabetes with end organ damage   | 17,278 (0.8) | 4,510 (1.0)  | 21,788 (0.8) | <0.001 |
| Moderate to severe liver disease | 1,166 (0.1)  | 1,108 (0.2)  | 2,274 (0.1)  | <0.001 |
| AIDS                             | 434 (0.0)    | 232 (0.1)    | 666 (0.0)    | <0.001 |

<sup>a</sup> The same person may be a comparison person in different cancer cohorts.

<sup>b</sup> Disorders as defined in the Charlson comorbidity index, grouped according to accumulated sum of scores. This index provides an overall score for comorbidity based on a composite of values weighted by level of severity assigned to 19 selected conditions scored from 1 to 6<sup>6</sup>. For the purposes of this study, no cancers were included in the index. Scores are summarized on the basis of information on hospitalizations from 1978 onwards. The weights are assigned for each condition that a patient has, and the total is the score. For example, chronic pulmonary (1) and hemiplegia (2) = total score (3). Score 1: myocardial infarct, congestive heart failure, peripheral vascular disease, cerebrovascular disease, dementia, chronic pulmonary disease, connective tissue disease, ulcer disease, mild liver disease, diabetes types 1 and 2. Score 2: hemiplegia, moderate-to-severe renal disease, diabetes with end-organ damage type 1 or type 2. Score 3: moderate-to-severe liver disease. Score 6: AIDS.

<sup>c</sup> Short education: mandatory education of up to 7 and 9 years for patients born before and after 1 January 1958, respectively; medium education: highest grade of primary school, secondary school or vocational education (8 – 12 years for patients born before 1 January 1958 and 10 – 12 years for patients born after 1 January 1958); higher education: >12 years of education.

<sup>d</sup> Household income after taxation and interest adjusted for number of persons in the household; categorised on the basis of sex-specific distribution of household disposable income per person.

**eTable2. Results of Cox models for the effect of the 12 most frequent cancer types (exposed) as compared with cancer-free comparisons (unexposed) on the incidence of somatic disease. All estimates are adjusted for gender, age and year group at inclusion, income, marital status and Charlson comorbidity score.**

| Cancer        | Disease group                                                | Events Exposed | Person-years exposed | Events unexposed | Person-years unexposed | HR   | 95% CI      | p        |
|---------------|--------------------------------------------------------------|----------------|----------------------|------------------|------------------------|------|-------------|----------|
| <b>Breast</b> | Infectious and parasitic diseases                            | 3,593          | 313,906              | 13,381           | 1,619,522              | 1.46 | [1.40;1.51] | < 0.0001 |
|               | New primary cancer                                           | 4,336          | 317,641              | 23,800           | 1,680,241              | 1.00 | [0.96;1.03] | 0.8454   |
|               | Diseases of the blood and blood-forming organs               | 2,439          | 321,915              | 9,028            | 1,645,107              | 1.48 | [1.41;1.55] | < 0.0001 |
|               | Endocrine, nutritional and metabolic diseases                | 5,201          | 297,994              | 22,226           | 1,531,097              | 1.26 | [1.22;1.29] | < 0.0001 |
|               | Diseases of the nervous system and sense organs              | 10,653         | 241,295              | 47,645           | 1,240,016              | 1.20 | [1.17;1.22] | < 0.0001 |
|               | Diseases of the circulatory system                           | 10,216         | 248,202              | 46,776           | 1,321,023              | 1.21 | [1.18;1.24] | < 0.0001 |
|               | Diseases of the respiratory system                           | 6,515          | 298,081              | 25,792           | 1,535,197              | 1.37 | [1.34;1.41] | < 0.0001 |
|               | Diseases of the digestive system                             | 8,519          | 267,306              | 37,717           | 1,391,429              | 1.21 | [1.18;1.24] | < 0.0001 |
|               | Diseases of the skin and subcutaneous tissue                 | 3,852          | 300,455              | 12,165           | 1,597,651              | 1.70 | [1.64;1.76] | < 0.0001 |
|               | Diseases of the musculoskeletal system and connective tissue | 11,788         | 221,355              | 52,228           | 1,174,499              | 1.20 | [1.18;1.22] | < 0.0001 |
|               | Diseases of the genitourinary system                         | 7,304          | 209,114              | 32,961           | 1,400,647              | 1.48 | [1.44;1.52] | < 0.0001 |
|               |                                                              |                |                      |                  |                        |      |             |          |
| <b>Lung</b>   | Infectious and parasitic diseases                            | 1,052          | 39,936               | 16,722           | 1,419,979              | 2.42 | [2.27;2.58] | < 0.0001 |
|               | New primary cancer                                           | 780            | 40,959               | 30,980           | 1,483,087              | 1.02 | [0.95;1.10] | 0.5573   |
|               | Diseases of the blood and blood-forming organs               | 950            | 39,706               | 11,144           | 1,448,797              | 3.52 | [3.29;3.76] | < 0.0001 |
|               | Endocrine, nutritional and metabolic diseases                | 1,294          | 37,579               | 21,791           | 1,358,023              | 2.24 | [2.11;2.37] | < 0.0001 |

|                 |                                                              |       |         |        |           |      |             |          |
|-----------------|--------------------------------------------------------------|-------|---------|--------|-----------|------|-------------|----------|
|                 | Diseases of the nervous system and sense organs              | 2,045 | 29,136  | 50,142 | 1,012,439 | 1.51 | [1.45;1.58] | < 0.0001 |
|                 | Diseases of the circulatory system                           | 2,176 | 27,846  | 54,518 | 1,066,512 | 1.68 | [1.61;1.76] | < 0.0001 |
|                 | Diseases of the respiratory system                           | 3,045 | 23,615  | 32,578 | 1,332,839 | 5.85 | [5.63;6.07] | < 0.0001 |
|                 | Diseases of the digestive system                             | 1,816 | 31,282  | 41,577 | 1,181,284 | 1.69 | [1.61;1.77] | < 0.0001 |
|                 | Diseases of the skin and subcutaneous tissue                 | 512   | 39,915  | 11,904 | 1,411,126 | 1.49 | [1.36;1.63] | < 0.0001 |
|                 | Diseases of the musculoskeletal system and connective tissue | 1,550 | 30,318  | 43,886 | 1,074,571 | 1.19 | [1.13;1.25] | < 0.0001 |
|                 | Diseases of the genitourinary system                         | 1,108 | 36,046  | 31,893 | 1,258,315 | 1.27 | [1.19;1.35] | < 0.0001 |
|                 |                                                              |       |         |        |           |      |             |          |
| <b>Prostate</b> | Infectious and parasitic diseases                            | 3,233 | 151,637 | 12,979 | 845,995   | 1.50 | [1.44;1.56] | < 0.0001 |
|                 | New primary cancer                                           | 2,760 | 155,696 | 24,620 | 885,962   | 0.65 | [0.63;0.68] | < 0.0001 |
|                 | Diseases of the blood and blood-forming organs               | 3,636 | 155,891 | 8,446  | 863,477   | 2.60 | [2.50;2.71] | < 0.0001 |
|                 | Endocrine, nutritional and metabolic diseases                | 2,872 | 149,779 | 14,312 | 817,175   | 1.17 | [1.13;1.22] | < 0.0001 |
|                 | Diseases of the nervous system and sense organs              | 7,076 | 103,039 | 33,074 | 583,756   | 1.23 | [1.20;1.26] | < 0.0001 |
|                 | Diseases of the circulatory system                           | 7,346 | 108,395 | 39,492 | 600,724   | 1.06 | [1.04;1.09] | < 0.0001 |
|                 | Diseases of the respiratory system                           | 4,816 | 143,913 | 25,723 | 786,540   | 1.12 | [1.09;1.16] | < 0.0001 |
|                 | Diseases of the digestive system                             | 6,767 | 116,493 | 29,677 | 693,423   | 1.37 | [1.33;1.41] | < 0.0001 |
|                 | Diseases of the skin and subcutaneous tissue                 | 1,550 | 153,791 | 8,011  | 843,457   | 1.09 | [1.03;1.15] | 0.0026   |
|                 | Diseases of the musculoskeletal system and connective tissue | 5,795 | 114,005 | 25,815 | 674,357   | 1.28 | [1.24;1.32] | < 0.0001 |
|                 | Diseases of the genitourinary system                         | 4,632 | 104,960 | 21,597 | 751,853   | 1.61 | [1.56;1.66] | < 0.0001 |

|                           |                                                              |       |         |        |         |      |             |             |
|---------------------------|--------------------------------------------------------------|-------|---------|--------|---------|------|-------------|-------------|
| <b>Colon</b>              | Infectious and parasitic diseases                            | 1,745 | 104,140 | 10,800 | 832,763 | 1.32 | [1.25;1.39] | <<br>0.0001 |
|                           | New primary cancer                                           | 2,221 | 104,461 | 18,066 | 871,981 | 1.05 | [1.00;1.09] | 0.0462      |
|                           | Diseases of the blood and blood-forming organs               | 1,466 | 97,661  | 7,528  | 848,153 | 1.78 | [1.68;1.88] | <<br>0.0001 |
|                           | Endocrine, nutritional and metabolic diseases                | 2,468 | 98,058  | 14,446 | 795,278 | 1.42 | [1.36;1.48] | <<br>0.0001 |
|                           | Diseases of the nervous system and sense organs              | 4,165 | 72,275  | 30,297 | 571,331 | 1.11 | [1.07;1.14] | <<br>0.0001 |
|                           | Diseases of the circulatory system                           | 4,137 | 75,528  | 34,440 | 619,639 | 1.01 | [0.98;1.04] | 0.6320      |
|                           | Diseases of the respiratory system                           | 2,982 | 98,249  | 20,955 | 778,740 | 1.16 | [1.11;1.20] | <<br>0.0001 |
|                           | Diseases of the digestive system                             | 4,143 | 59,476  | 25,201 | 694,338 | 1.91 | [1.85;1.98] | <<br>0.0001 |
|                           | Diseases of the skin and subcutaneous tissue                 | 1,076 | 104,655 | 7,307  | 829,112 | 1.16 | [1.09;1.23] | <<br>0.0001 |
|                           | Diseases of the musculoskeletal system and connective tissue | 3,542 | 80,484  | 25,820 | 632,611 | 1.05 | [1.02;1.09] | 0.0049      |
|                           | Diseases of the genitourinary system                         | 2,992 | 89,501  | 19,639 | 738,588 | 1.27 | [1.22;1.32] | <<br>0.0001 |
|                           |                                                              |       |         |        |         |      |             |             |
| <b>Malignant melanoma</b> | Infectious and parasitic diseases                            | 839   | 90,584  | 4,021  | 440,946 | 1.08 | [1.00;1.17] | 0.0379      |
|                           | New primary cancer                                           | 1,371 | 89,646  | 7,165  | 458,284 | 1.03 | [0.97;1.09] | 0.3787      |
|                           | Diseases of the blood and blood-forming organs               | 652   | 92,354  | 2,451  | 449,598 | 1.40 | [1.28;1.53] | <<br>0.0001 |
|                           | Endocrine, nutritional and metabolic diseases                | 1,227 | 87,147  | 5,648  | 421,579 | 1.10 | [1.04;1.17] | 0.0020      |
|                           | Diseases of the nervous system and sense organs              | 2,793 | 69,943  | 12,742 | 342,798 | 1.11 | [1.07;1.16] | <<br>0.0001 |
|                           | Diseases of the circulatory system                           | 2,760 | 71,414  | 13,661 | 353,791 | 1.05 | [1.00;1.09] | 0.0354      |
|                           | Diseases of the respiratory system                           | 1,479 | 87,050  | 7,647  | 419,074 | 0.99 | [0.94;1.05] | 0.8141      |
|                           | Diseases of the digestive system                             | 2,262 | 76,893  | 11,081 | 375,055 | 1.03 | [0.99;1.08] | 0.1725      |
|                           | Diseases of the skin and subcutaneous tissue                 | 1,272 | 85,102  | 3,361  | 435,488 | 2.00 | [1.88;2.14] | <<br>0.0001 |

|                                  |                                                              |       |        |        |         |      |             |          |
|----------------------------------|--------------------------------------------------------------|-------|--------|--------|---------|------|-------------|----------|
|                                  | Diseases of the musculoskeletal system and connective tissue | 2,873 | 66,533 | 13,215 | 335,237 | 1.09 | [1.05;1.14] | < 0.0001 |
|                                  | Diseases of the genitourinary system                         | 1,847 | 78,201 | 8,685  | 391,595 | 1.08 | [1.03;1.14] | 0.0022   |
|                                  |                                                              |       |        |        |         |      |             |          |
| <b>Bladder and urinary tract</b> | Infectious and parasitic diseases                            | 1,738 | 80,243 | 7,264  | 548,574 | 1.69 | [1.60;1.78] | < 0.0001 |
|                                  | New primary cancer                                           | 2,249 | 78,675 | 13,216 | 574,373 | 1.26 | [1.20;1.32] | < 0.0001 |
|                                  | Diseases of the blood and blood-forming organs               | 1,336 | 83,114 | 4,993  | 559,757 | 1.91 | [1.79;2.02] | < 0.0001 |
|                                  | Endocrine, nutritional and metabolic diseases                | 1,719 | 78,048 | 9,057  | 527,270 | 1.34 | [1.27;1.41] | < 0.0001 |
|                                  | Diseases of the nervous system and sense organs              | 3,128 | 56,495 | 20,152 | 376,224 | 1.06 | [1.02;1.10] | 0.0047   |
|                                  | Diseases of the circulatory system                           | 3,681 | 55,797 | 23,296 | 397,328 | 1.16 | [1.12;1.20] | < 0.0001 |
|                                  | Diseases of the respiratory system                           | 2,600 | 74,474 | 14,829 | 510,953 | 1.25 | [1.20;1.30] | < 0.0001 |
|                                  | Diseases of the digestive system                             | 3,305 | 62,873 | 17,249 | 450,255 | 1.37 | [1.32;1.42] | < 0.0001 |
|                                  | Diseases of the skin and subcutaneous tissue                 | 813   | 81,666 | 4,779  | 546,652 | 1.13 | [1.05;1.22] | 0.0010   |
|                                  | Diseases of the musculoskeletal system and connective tissue | 2,544 | 63,828 | 16,182 | 426,180 | 1.04 | [1.00;1.09] | 0.0619   |
|                                  | Diseases of the genitourinary system                         | 2,871 | 54,807 | 13,297 | 484,067 | 1.93 | [1.86;2.01] | < 0.0001 |
|                                  |                                                              |       |        |        |         |      |             |          |
| <b>Rectum</b>                    | Infectious and parasitic diseases                            | 1,256 | 69,612 | 6,591  | 525,505 | 1.51 | [1.42;1.61] | < 0.0001 |
|                                  | New primary cancer                                           | 1,295 | 69,366 | 11,417 | 549,519 | 0.93 | [0.88;0.98] | 0.0108   |
|                                  | Diseases of the blood and blood-forming organs               | 1,066 | 70,479 | 4,313  | 535,921 | 2.00 | [1.87;2.14] | < 0.0001 |
|                                  | Endocrine, nutritional and metabolic diseases                | 1,468 | 65,362 | 8,378  | 502,346 | 1.41 | [1.33;1.49] | < 0.0001 |
|                                  | Diseases of the nervous system and sense organs              | 2,601 | 50,967 | 18,612 | 370,977 | 1.04 | [1.00;1.09] | 0.0435   |

|                                         |                                                              |       |        |        |         |      |             |             |
|-----------------------------------------|--------------------------------------------------------------|-------|--------|--------|---------|------|-------------|-------------|
|                                         | Diseases of the circulatory system                           | 2,591 | 51,632 | 21,006 | 392,654 | 0.97 | [0.93;1.01] | 0.1980      |
|                                         | Diseases of the respiratory system                           | 1,972 | 65,817 | 12,568 | 493,045 | 1.24 | [1.19;1.30] | <<br>0.0001 |
|                                         | Diseases of the digestive system                             | 3,184 | 39,122 | 15,652 | 437,102 | 2.26 | [2.18;2.35] | <<br>0.0001 |
|                                         | Diseases of the skin and subcutaneous tissue                 | 835   | 68,621 | 4,478  | 522,200 | 1.45 | [1.35;1.56] | <<br>0.0001 |
|                                         | Diseases of the musculoskeletal system and connective tissue | 2,186 | 55,833 | 15,900 | 401,867 | 0.97 | [0.92;1.01] | 0.1383      |
|                                         | Diseases of the genitourinary system                         | 2,214 | 56,285 | 11,953 | 466,326 | 1.55 | [1.48;1.62] | <<br>0.0001 |
|                                         |                                                              |       |        |        |         |      |             |             |
| <b>Brain and central nervous system</b> | Infectious and parasitic diseases                            | 518   | 46,528 | 3,483  | 378,678 | 1.32 | [1.20;1.45] | <<br>0.0001 |
|                                         | New primary cancer                                           | 765   | 46,048 | 6,170  | 393,517 | 1.32 | [1.20;1.45] | <<br>0.0001 |
|                                         | Diseases of the blood and blood-forming organs               | 283   | 47,878 | 2,267  | 385,682 | 1.18 | [1.04;1.34] | 0.0101      |
|                                         | Endocrine, nutritional and metabolic diseases                | 738   | 42,842 | 5,029  | 362,050 | 1.33 | [1.23;1.44] | <<br>0.0001 |
|                                         | Diseases of the nervous system and sense organs              | 1,540 | 18,075 | 11,374 | 287,740 | 2.27 | [2.15;2.40] | <<br>0.0001 |
|                                         | Diseases of the circulatory system                           | 1,302 | 34,608 | 12,055 | 301,323 | 1.10 | [1.04;1.16] | 0.0016      |
|                                         | Diseases of the respiratory system                           | 936   | 43,806 | 6,815  | 358,379 | 1.27 | [1.18;1.36] | <<br>0.0001 |
|                                         | Diseases of the digestive system                             | 1,267 | 38,713 | 9,649  | 320,326 | 1.15 | [1.08;1.22] | <<br>0.0001 |
|                                         | Diseases of the skin and subcutaneous tissue                 | 434   | 46,333 | 2,806  | 373,850 | 1.24 | [1.12;1.38] | <<br>0.0001 |
|                                         | Diseases of the musculoskeletal system and connective tissue | 1,407 | 32,931 | 11,487 | 285,692 | 1.03 | [0.97;1.09] | 0.3472      |
|                                         | Diseases of the genitourinary system                         | 1,138 | 39,361 | 7,368  | 336,614 | 1.37 | [1.28;1.46] | <<br>0.0001 |
|                                         |                                                              |       |        |        |         |      |             |             |
| <b>Non-Hodgkin</b>                      | Infectious and parasitic diseases                            | 633   | 19,835 | 1,579  | 146,214 | 3.21 | [2.92;3.53] | <<br>0.0001 |



|                 |                                                              |     |        |        |         |      |             |          |
|-----------------|--------------------------------------------------------------|-----|--------|--------|---------|------|-------------|----------|
| <b>lymphoma</b> | New primary cancer                                           | 417 | 23,020 | 2,740  | 151,922 | 1.06 | [0.95;1.17] | 0.2937   |
|                 | Diseases of the blood and blood-forming organs               | 297 | 21,083 | 1,019  | 148,478 | 2.31 | [2.03;2.64] | < 0.0001 |
|                 | Endocrine, nutritional and metabolic diseases                | 430 | 21,109 | 2,211  | 139,480 | 1.38 | [1.24;1.53] | < 0.0001 |
|                 | Diseases of the nervous system and sense organs              | 952 | 16,311 | 4,971  | 109,048 | 1.34 | [1.25;1.44] | < 0.0001 |
|                 | Diseases of the circulatory system                           | 883 | 16,059 | 5,245  | 114,240 | 1.28 | [1.19;1.37] | < 0.0001 |
|                 | Diseases of the respiratory system                           | 899 | 18,409 | 3,006  | 138,935 | 2.44 | [2.26;2.63] | < 0.0001 |
|                 | Diseases of the digestive system                             | 819 | 16,112 | 4,069  | 125,199 | 1.59 | [1.47;1.72] | < 0.0001 |
|                 | Diseases of the skin and subcutaneous tissue                 | 374 | 21,164 | 1,126  | 145,024 | 2.28 | [2.03;2.57] | < 0.0001 |
|                 | Diseases of the musculoskeletal system and connective tissue | 804 | 16,177 | 4,700  | 111,907 | 1.16 | [1.07;1.25] | 0.0001   |
|                 | Diseases of the genitourinary system                         | 605 | 19,294 | 3,210  | 131,689 | 1.32 | [1.20;1.44] | < 0.0001 |
|                 |                                                              |     |        |        |         |      |             |          |
| <b>Pancreas</b> | Infectious and parasitic diseases                            | 170 | 3,375  | 3,756  | 308,372 | 4.93 | [4.20;5.79] | < 0.0001 |
|                 | New primary cancer                                           | 61  | 3,473  | 6,420  | 322,778 | 1.04 | [0.81;1.35] | 0.7377   |
|                 | Diseases of the blood and blood-forming organs               | 174 | 3,315  | 2,559  | 314,528 | 8.19 | [6.97;9.62] | < 0.0001 |
|                 | Endocrine, nutritional and metabolic diseases                | 215 | 2,379  | 5,084  | 295,043 | 6.00 | [5.21;6.92] | < 0.0001 |
|                 | Diseases of the nervous system and sense organs              | 126 | 2,761  | 10,851 | 216,912 | 1.07 | [0.90;1.28] | 0.4264   |
|                 | Diseases of the circulatory system                           | 214 | 2,772  | 12,438 | 231,164 | 1.74 | [1.51;1.99] | < 0.0001 |
|                 | Diseases of the respiratory system                           | 171 | 3,196  | 7,453  | 289,020 | 2.55 | [2.18;2.97] | < 0.0001 |
|                 | Diseases of the digestive system                             | 224 | 1,351  | 9,055  | 257,257 | 5.24 | [4.57;6.01] | < 0.0001 |

|                 |                                                              |       |        |       |         |      |             |          |
|-----------------|--------------------------------------------------------------|-------|--------|-------|---------|------|-------------|----------|
|                 | Diseases of the skin and subcutaneous tissue                 | 44    | 3,462  | 2,681 | 306,885 | 1.54 | [1.14;2.09] | 0.0048   |
|                 | Diseases of the musculoskeletal system and connective tissue | 126   | 2,923  | 9,474 | 234,356 | 1.05 | [0.88;1.26] | 0.5607   |
|                 | Diseases of the genitourinary system                         | 134   | 3,062  | 7,086 | 274,703 | 1.87 | [1.57;2.22] | < 0.0001 |
|                 |                                                              |       |        |       |         |      |             |          |
| <b>Kidney</b>   | Infectious and parasitic diseases                            | 459   | 22,721 | 2,460 | 219,276 | 1.90 | [1.71;2.10] | < 0.0001 |
|                 | New primary cancer                                           | 504   | 22,926 | 4,342 | 229,169 | 1.24 | [1.13;1.37] | < 0.0001 |
|                 | Diseases of the blood and blood-forming organs               | 486   | 22,770 | 1,630 | 223,945 | 3.18 | [2.87;3.53] | < 0.0001 |
|                 | Endocrine, nutritional and metabolic diseases                | 662   | 20,767 | 3,287 | 210,133 | 2.18 | [2.00;2.37] | < 0.0001 |
|                 | Diseases of the nervous system and sense organs              | 919   | 16,503 | 7,495 | 159,759 | 1.23 | [1.15;1.32] | < 0.0001 |
|                 | Diseases of the circulatory system                           | 934   | 15,677 | 8,156 | 168,028 | 1.31 | [1.22;1.40] | < 0.0001 |
|                 | Diseases of the respiratory system                           | 791   | 20,742 | 4,793 | 206,258 | 1.73 | [1.60;1.87] | < 0.0001 |
|                 | Diseases of the digestive system                             | 896   | 16,086 | 6,268 | 183,021 | 1.64 | [1.53;1.77] | < 0.0001 |
|                 | Diseases of the skin and subcutaneous tissue                 | 286   | 22,796 | 1,827 | 218,022 | 1.46 | [1.28;1.65] | < 0.0001 |
|                 | Diseases of the musculoskeletal system and connective tissue | 838   | 16,485 | 6,605 | 167,839 | 1.25 | [1.17;1.35] | < 0.0001 |
|                 | Diseases of the genitourinary system                         | 682   | 16,642 | 4,724 | 196,667 | 1.78 | [1.64;1.93] | < 0.0001 |
|                 |                                                              |       |        |       |         |      |             |          |
| <b>Leukemia</b> | Infectious and parasitic diseases                            | 1,292 | 29,249 | 3,376 | 272,573 | 3.85 | [3.60;4.11] | < 0.0001 |
|                 | New primary cancer                                           | 684   | 33,298 | 5,708 | 284,827 | 1.12 | [1.03;1.21] | 0.0063   |
|                 | Diseases of the blood and blood-forming organs               | 763   | 29,493 | 2,220 | 277,814 | 3.73 | [3.43;4.06] | < 0.0001 |

|  |                                                              |       |        |        |         |      |             |             |
|--|--------------------------------------------------------------|-------|--------|--------|---------|------|-------------|-------------|
|  | Endocrine, nutritional and metabolic diseases                | 680   | 31,322 | 4,306  | 261,369 | 1.46 | [1.35;1.59] | <<br>0.0001 |
|  | Diseases of the nervous system and sense organs              | 1,438 | 23,050 | 9,416  | 192,616 | 1.33 | [1.26;1.41] | <<br>0.0001 |
|  | Diseases of the circulatory system                           | 1,381 | 24,098 | 10,569 | 204,872 | 1.21 | [1.14;1.28] | <<br>0.0001 |
|  | Diseases of the respiratory system                           | 1,731 | 26,836 | 6,563  | 255,979 | 2.80 | [2.65;2.95] | <<br>0.0001 |
|  | Diseases of the digestive system                             | 1,290 | 25,334 | 8,023  | 227,837 | 1.49 | [1.40;1.58] | <<br>0.0001 |
|  | Diseases of the skin and subcutaneous tissue                 | 644   | 31,310 | 2,321  | 271,332 | 2.47 | [2.26;2.70] | <<br>0.0001 |
|  | Diseases of the musculoskeletal system and connective tissue | 1,159 | 24,579 | 8,060  | 208,927 | 1.19 | [1.12;1.27] | <<br>0.0001 |
|  | Diseases of the genitourinary system                         | 968   | 28,219 | 6,166  | 243,082 | 1.45 | [1.35;1.55] | <<br>0.0001 |

**eFigure 1.** Adjusted HRs and 95% CIs for hospitalization for somatic diseases in the 11 main ICD-10 diagnostic groups in Danish survivors of malignant melanoma, bladder, rectum and brain cancer and cancer-free matched comparison people.

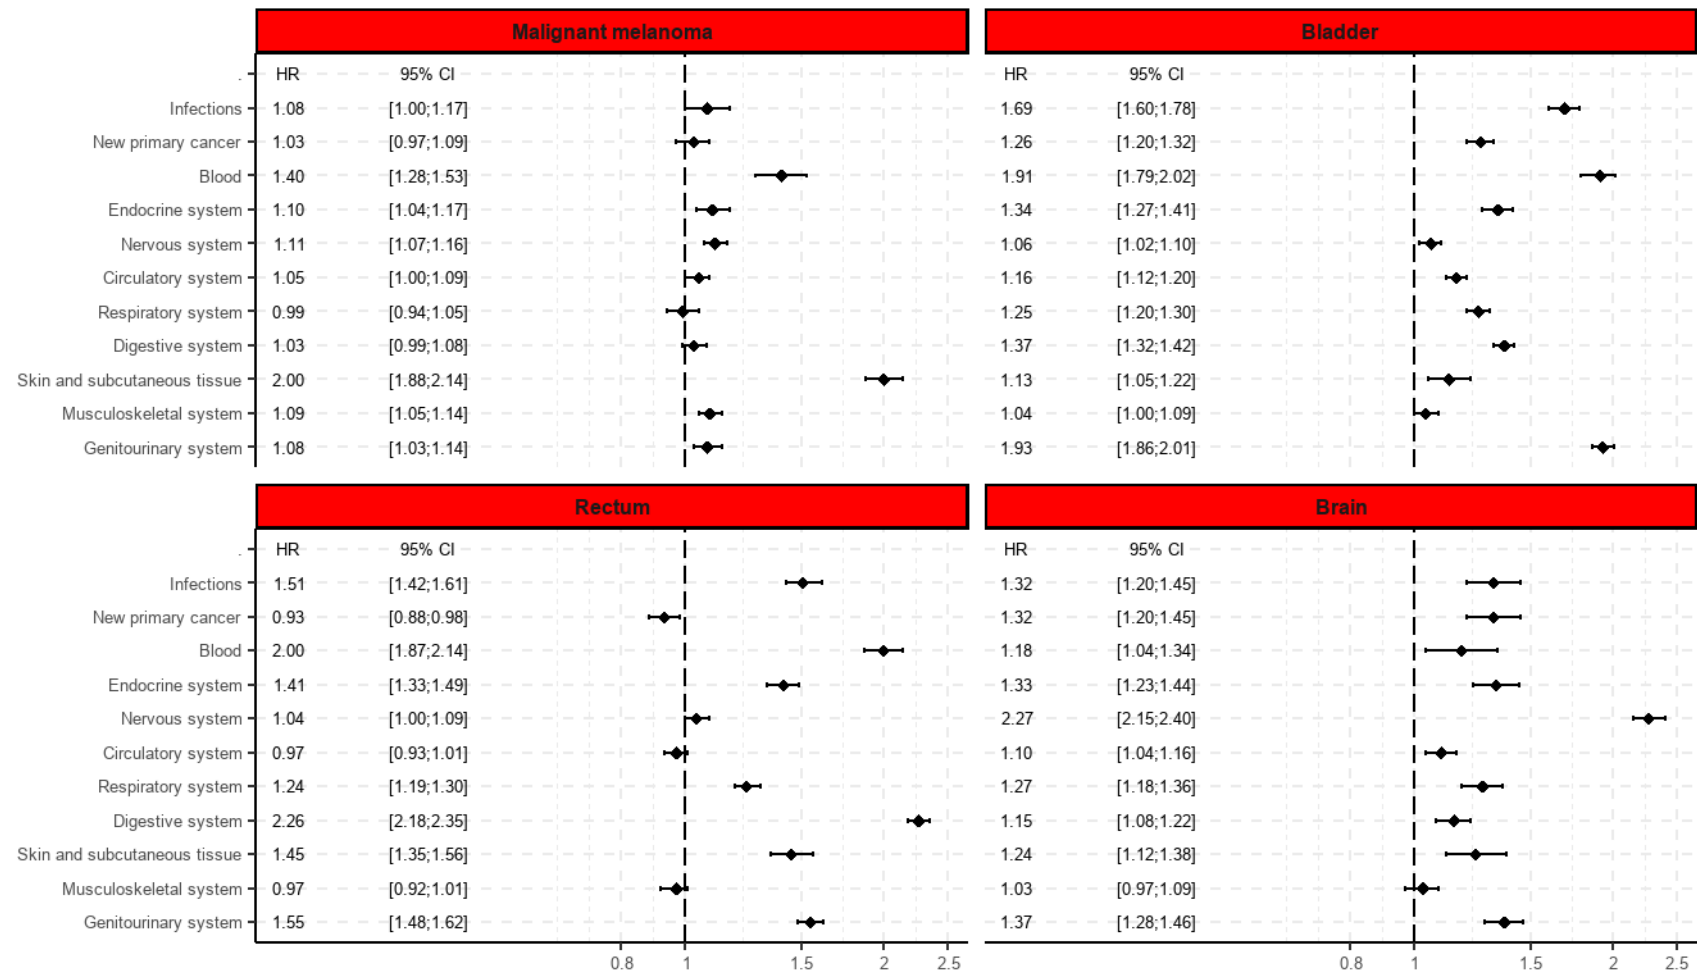

**eFigure 2.** Adjusted HRs and 95% CIs for hospitalization for somatic diseases in the 11 main ICD-10 diagnostic groups in Danish survivors of non-Hodgkin lymphoma, pancreas and kidney cancer and leukemia and cancer-free matched comparison people.

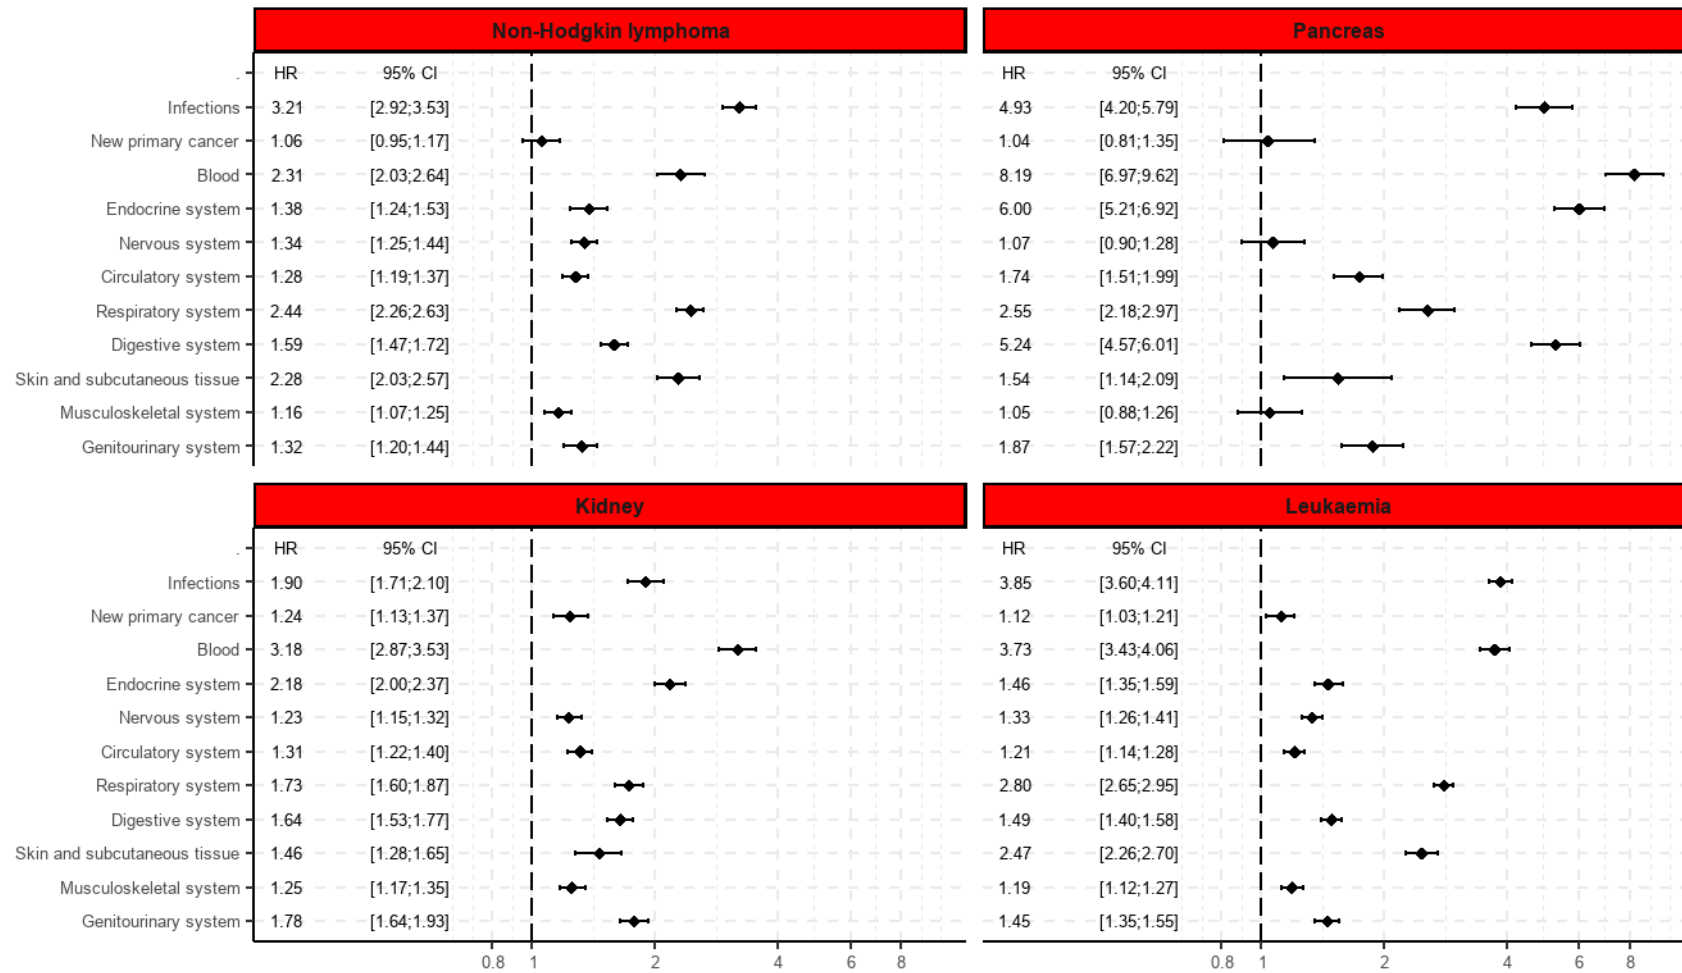

**eFigure 3.** Adjusted cumulative incidence risk difference and 95% CIs for hospitalization five years after diagnosis for somatic disease in the 11 main ICD-10 diagnostic groups among Danish survivors of malignant melanoma, bladder, rectum and brain cancer and cancer-free matched comparison people.

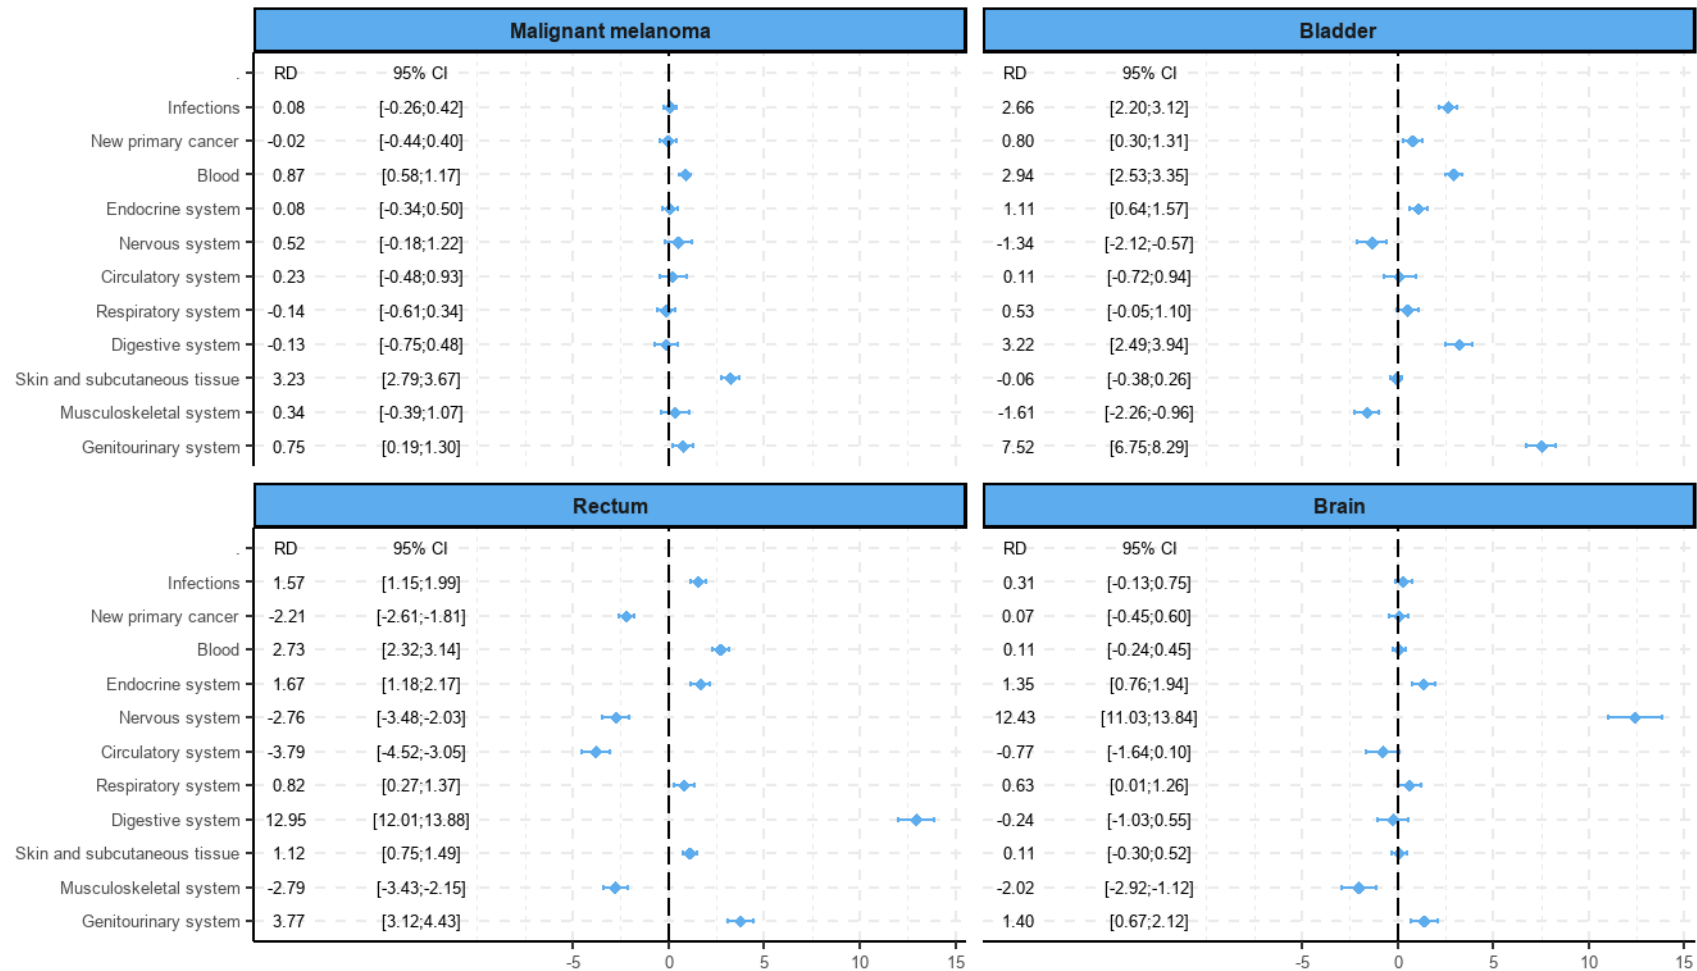

**eFigure 4.** Adjusted cumulative incidence risk difference and 95% CIs for hospitalization five years after diagnosis for somatic disease in the 11 main ICD-10 diagnostic groups among Danish survivors of non-Hodgkin lymphoma, pancreas and kidney cancer and leukemia and cancer-free matched comparison people.

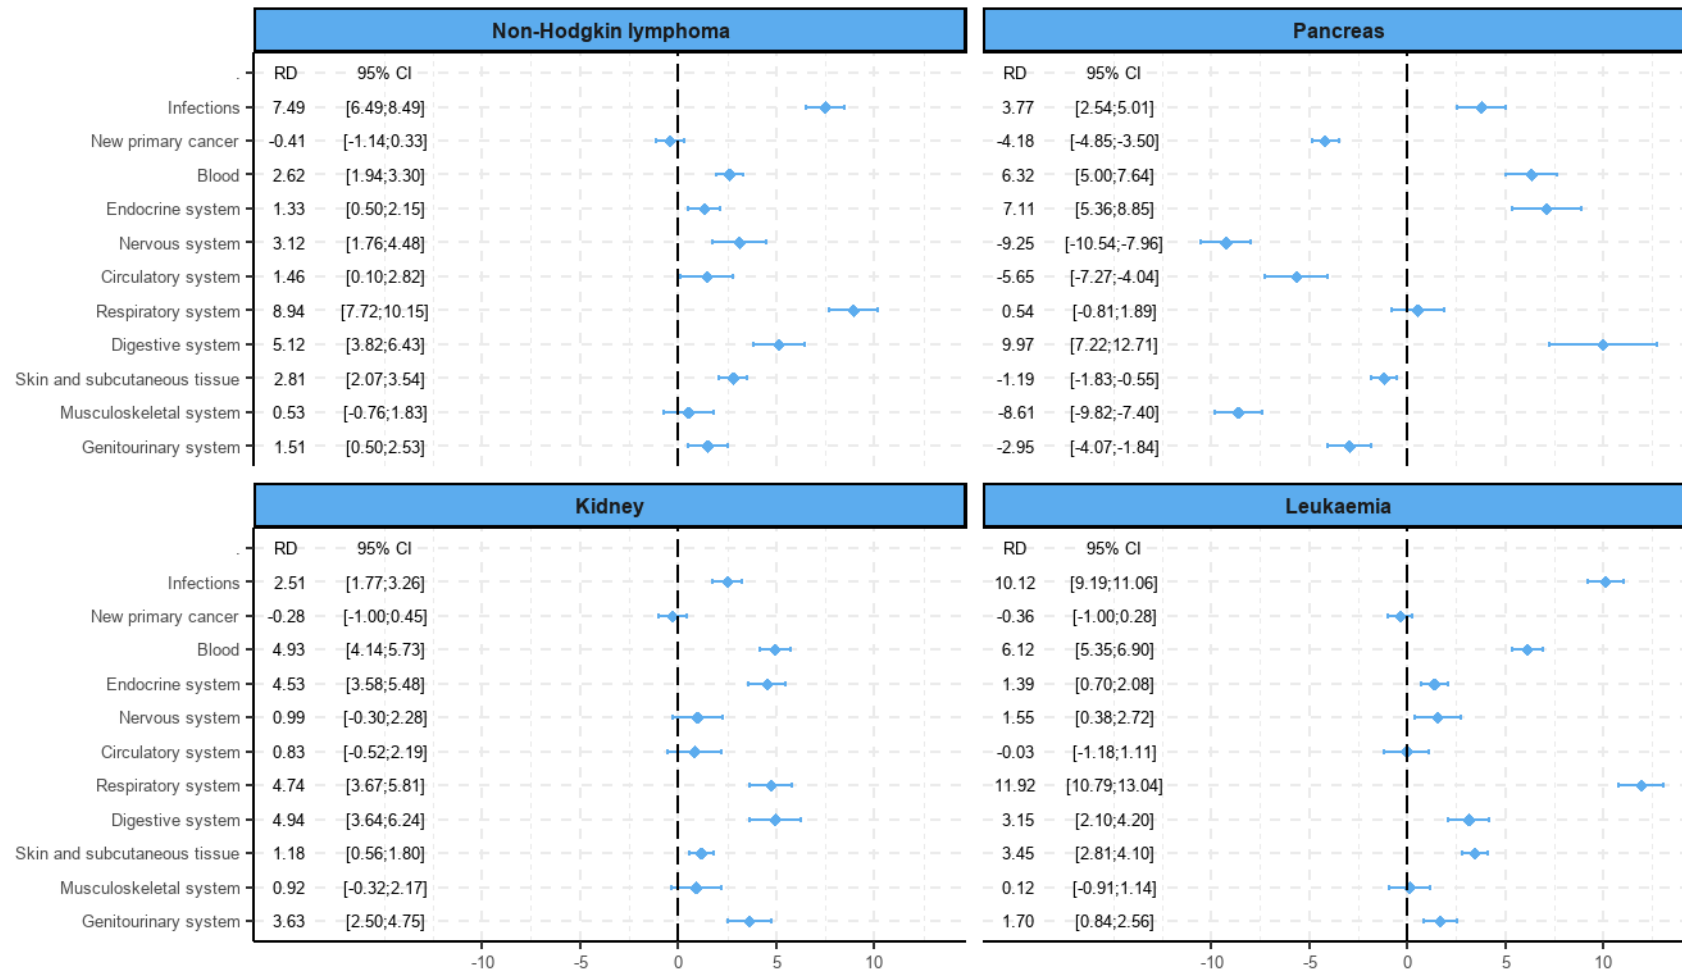

**eFigure 5.** Adjusted HRs and 95% CIs for hospitalization for new primary cancers among Danish survivors of malignant melanoma, bladder, rectum, and brain cancer, non-Hodgkin lymphoma, pancreas and kidney cancer and leukemia and matched cancer-free comparison people. Solid lines represent HRs and the two dashed lines 95% CIs. Note that the y-axes are not the same. *P* values for test of hypothesis of constant HR over time.

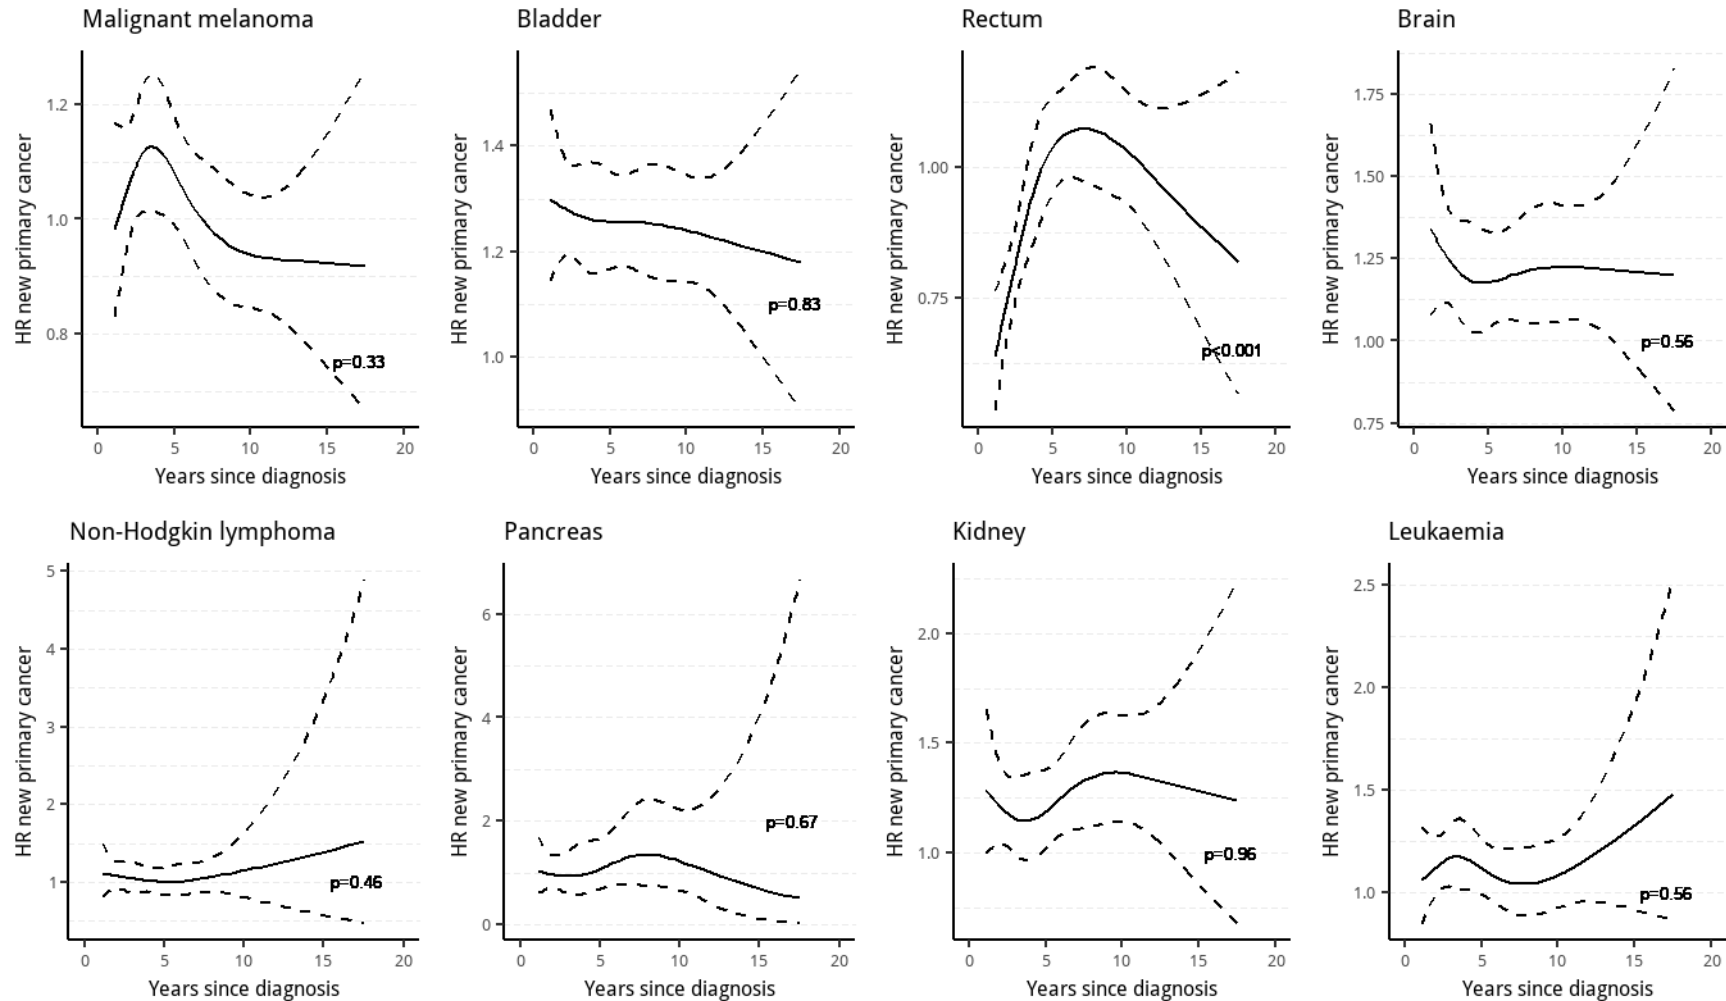



**eFigure 6.** Adjusted HRs and 95% CIs for hospitalization for infectious and parasitic diseases among Danish survivors of malignant melanoma, bladder, rectum, and brain cancer, non-Hodgkin lymphoma, pancreas and kidney cancer and leukemia and matched cancer-free comparison people. Solid lines represent HRs and the two dashed lines 95% CIs. Note that the y-axes are not the same. *P* values for test of hypothesis of constant HR over time.

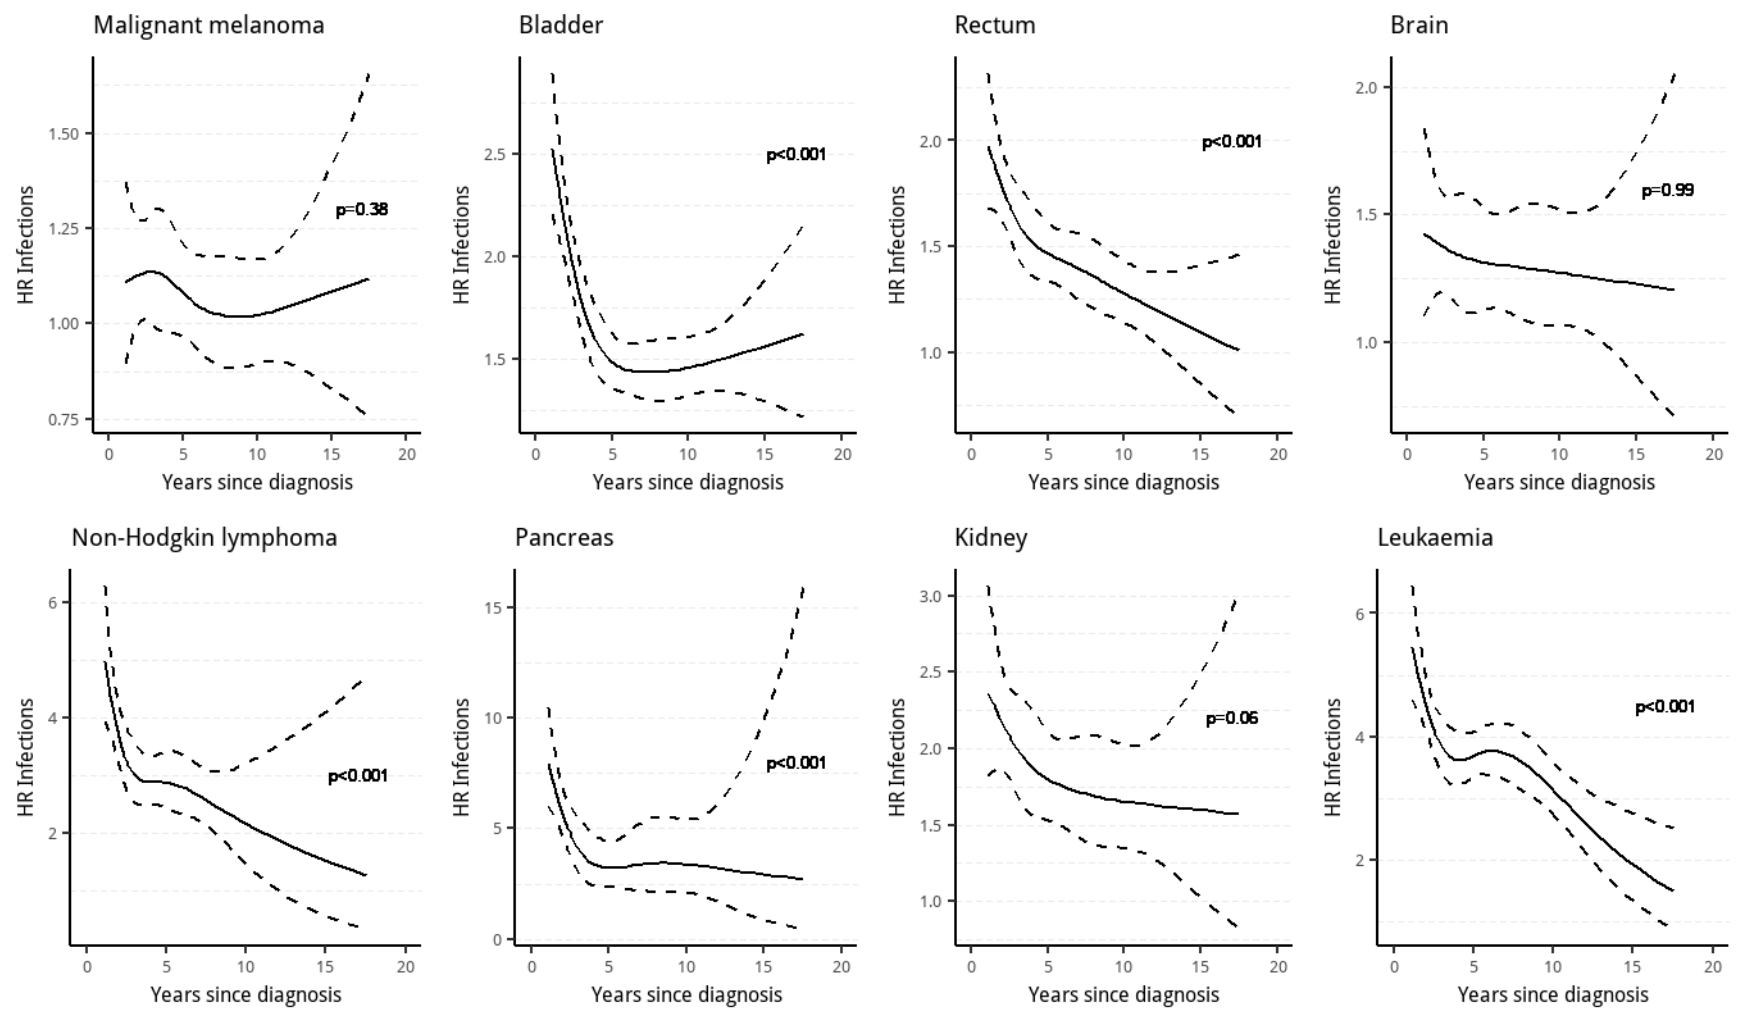

**eFigure 7.** Adjusted HRs and 95% CIs for hospitalization of survivors of the 12 most frequent cancer types for diseases of the blood and blood-forming organs as compared with matched cancer-free comparison people. Solid lines represent HRs and the two dashed lines 95% CIs. Note that the y-axes are not the same. *P* values for test of hypothesis of constant HR over time.

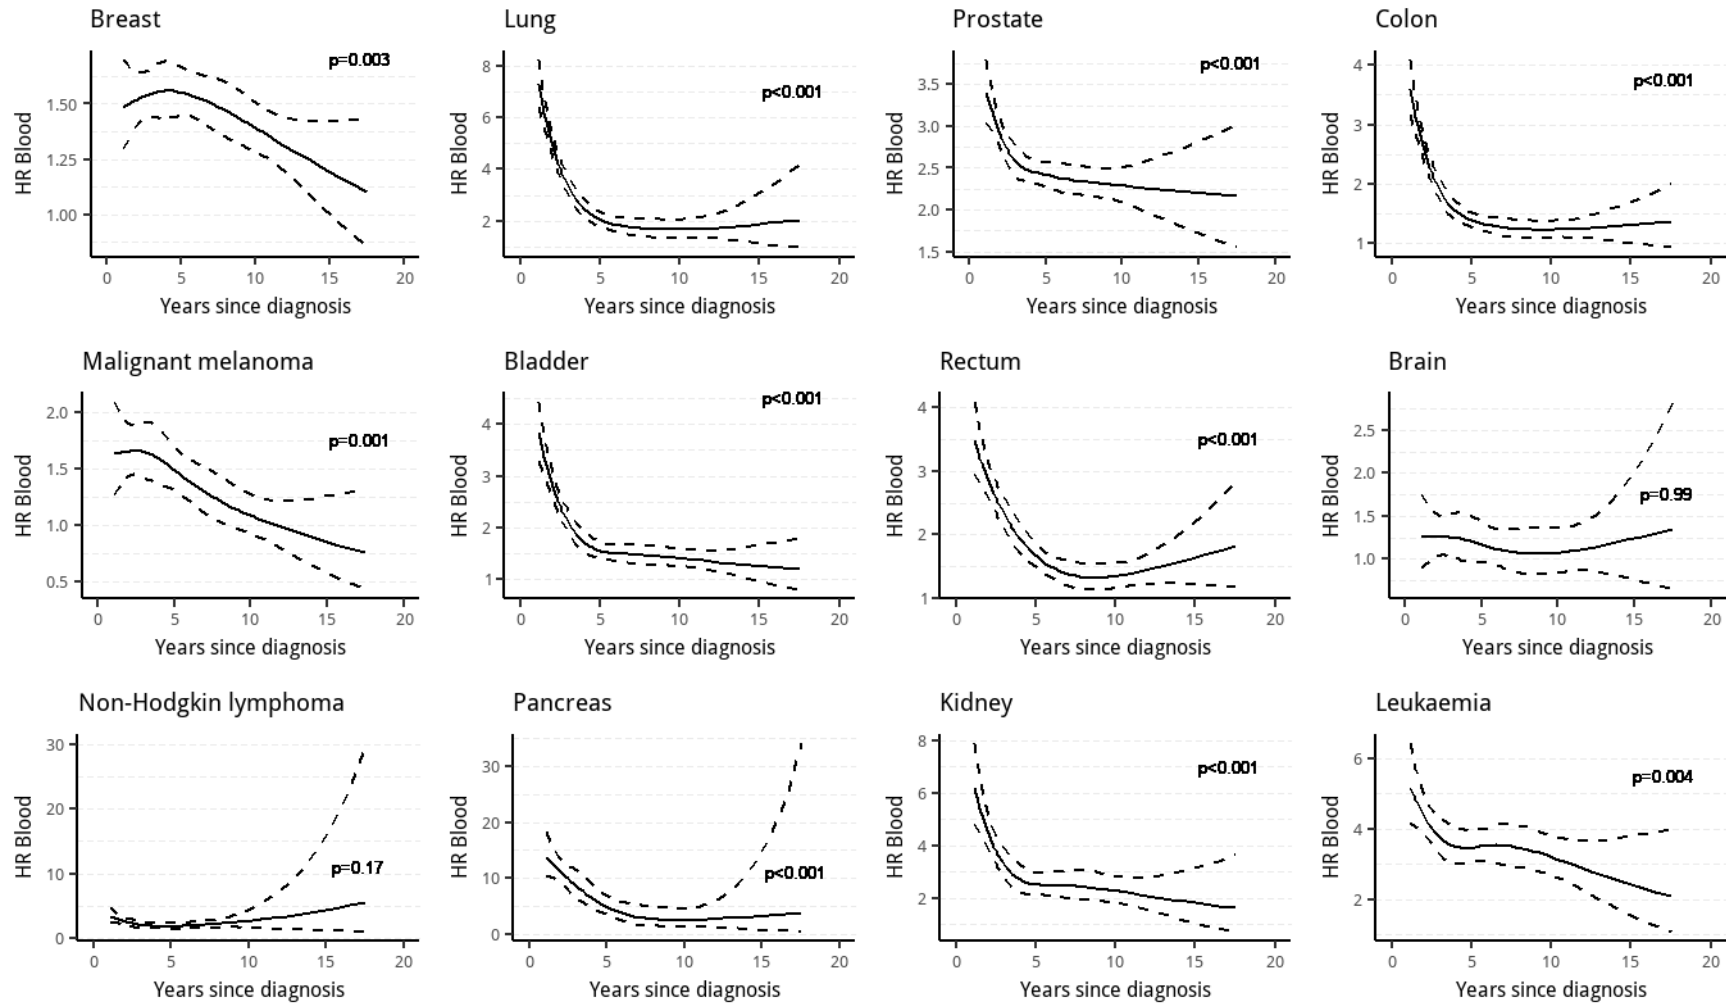

**eFigure 8.** Adjusted HRs and 95% CIs for hospitalization of survivors of the 12 most frequent cancer types for endocrine, nutritional and metabolic diseases as compared with matched cancer-free comparison people. Solid lines represent HRs and the two dashed lines 95% CIs. Note that the y-axes are not the same. *P* values for test of hypothesis of constant HR over time.

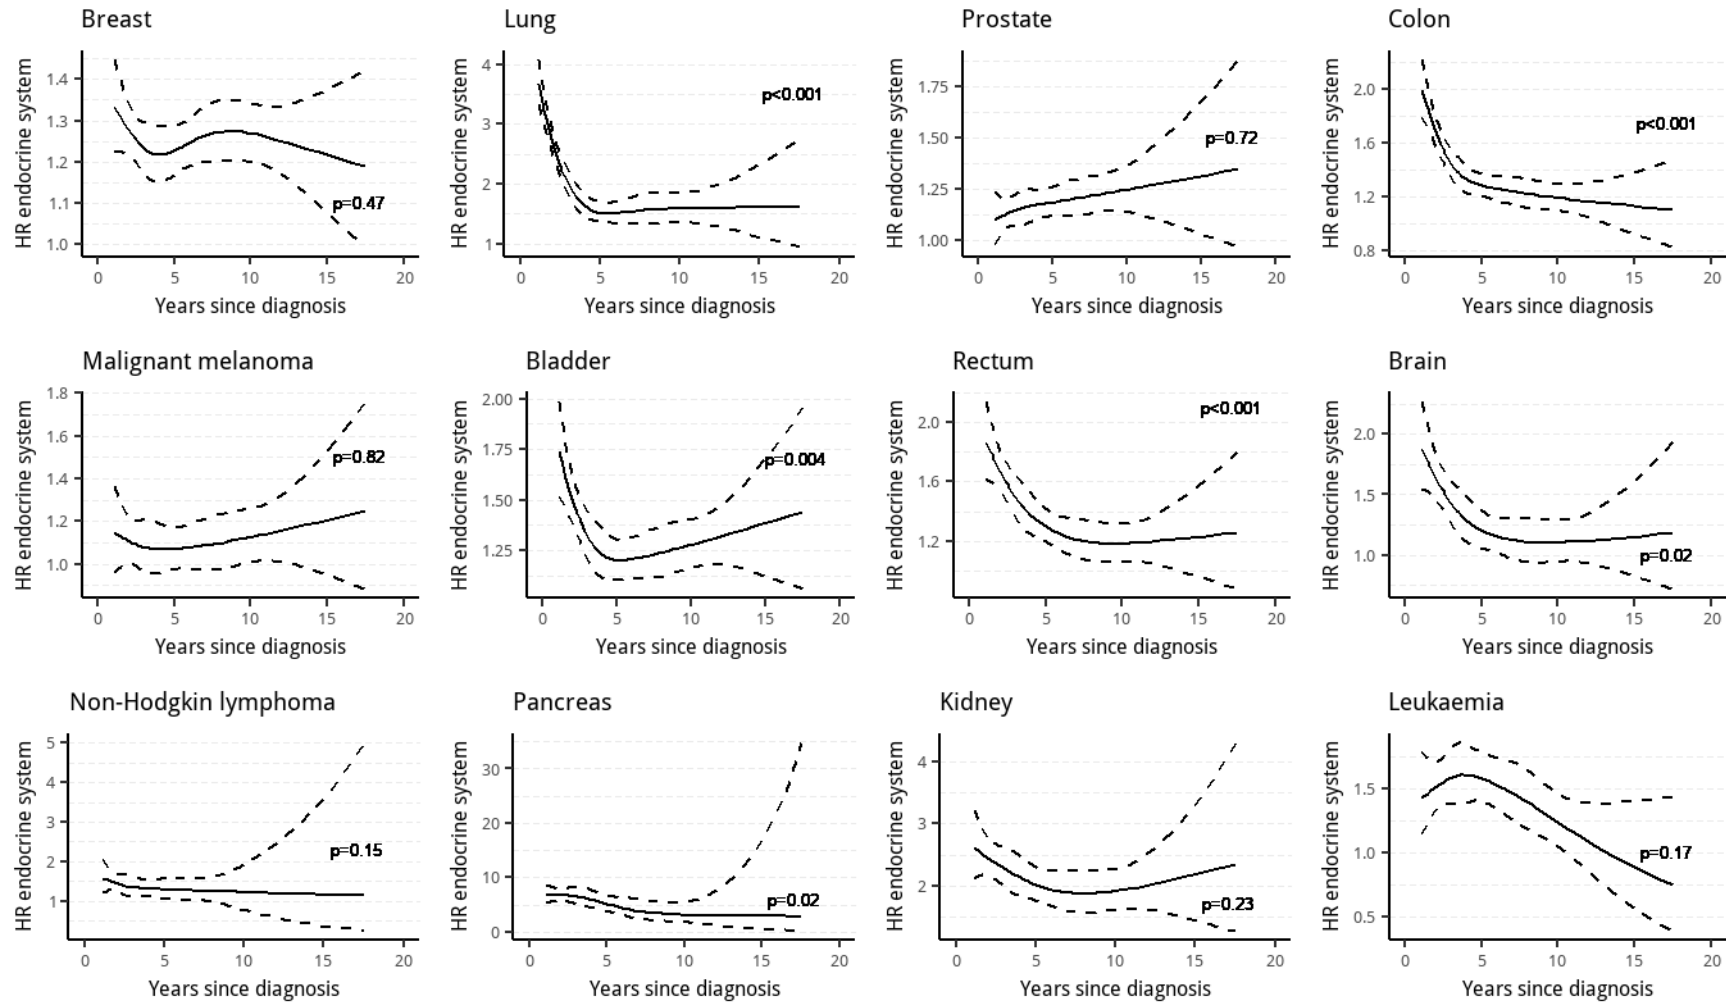

**eFigure 9.** Adjusted HRs and 95% CIs for hospitalization of survivors of the 12 most frequent cancer types for diseases of the nervous system and senses organs as compared with matched cancer-free comparison people. Solid lines represent HRs and the two dashed lines 95% CIs. Note that the y-axes are not the same. *P* values for test of hypothesis of constant HR over time.

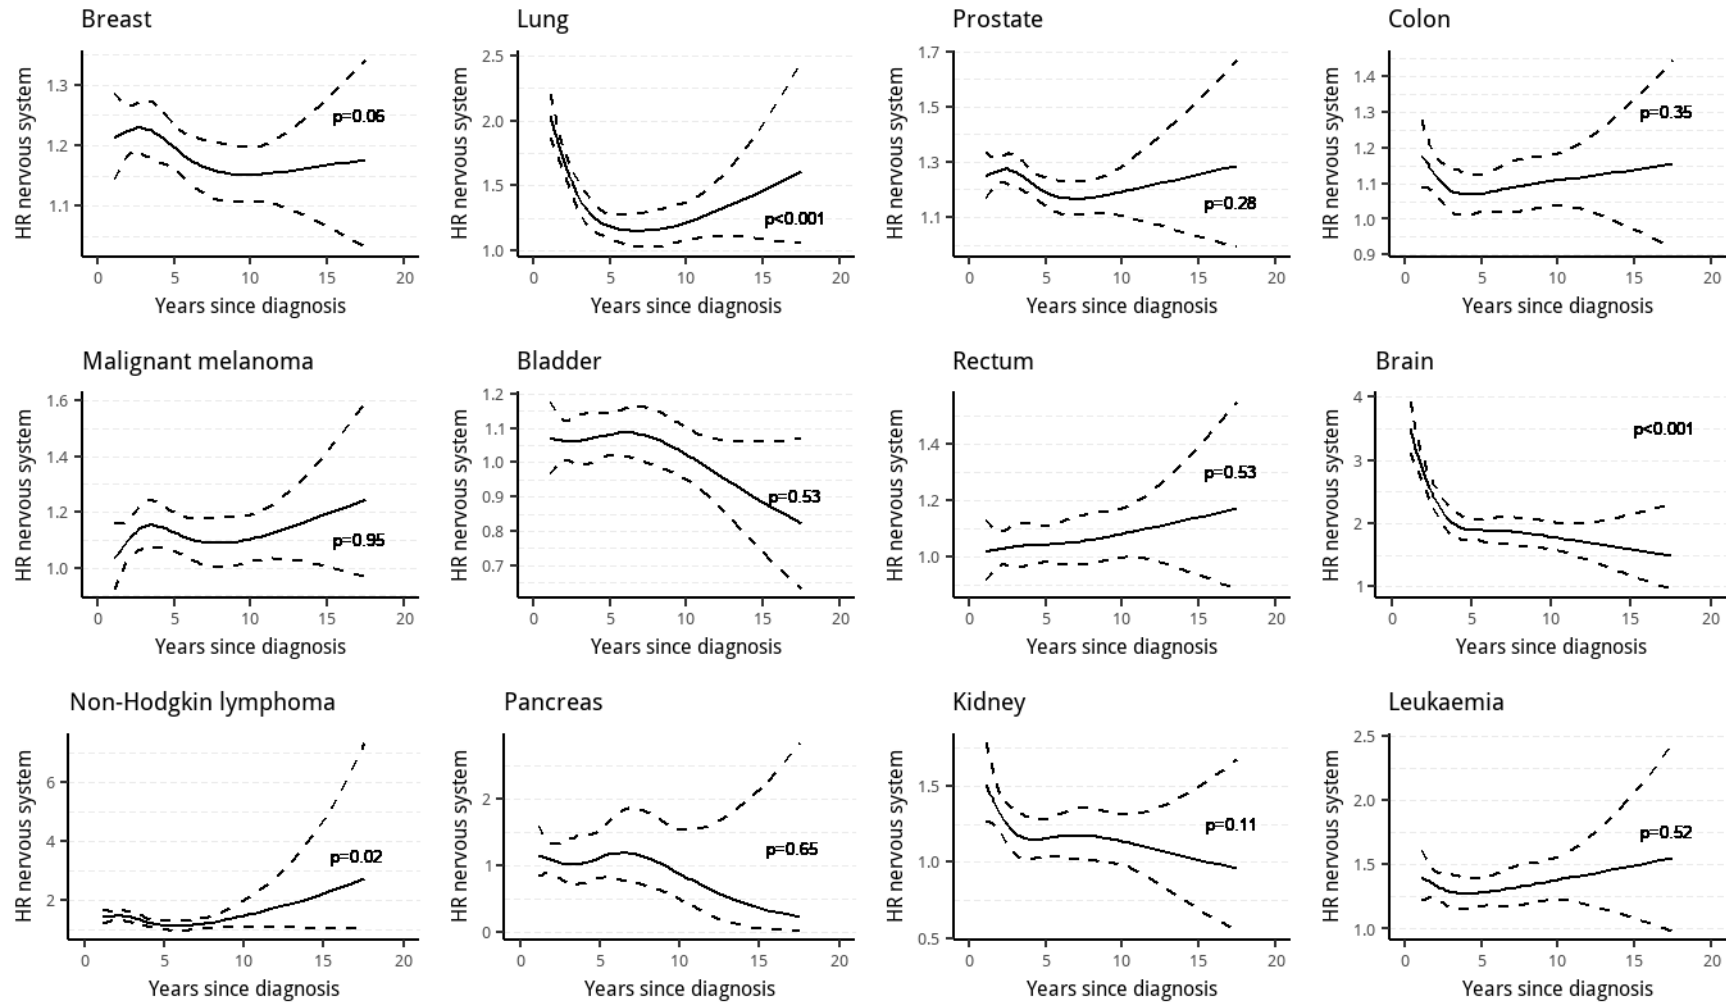

**eFigure 10.** Adjusted HRs and 95% CIs for hospitalization of survivors of the 12 most frequent cancer types for diseases of the circulatory system as compared with matched cancer-free comparison people. Solid lines represent HRs and the two dashed lines 95% CIs. Note that the y-axes are not the same. *P* values for test of hypothesis of constant HR over time.

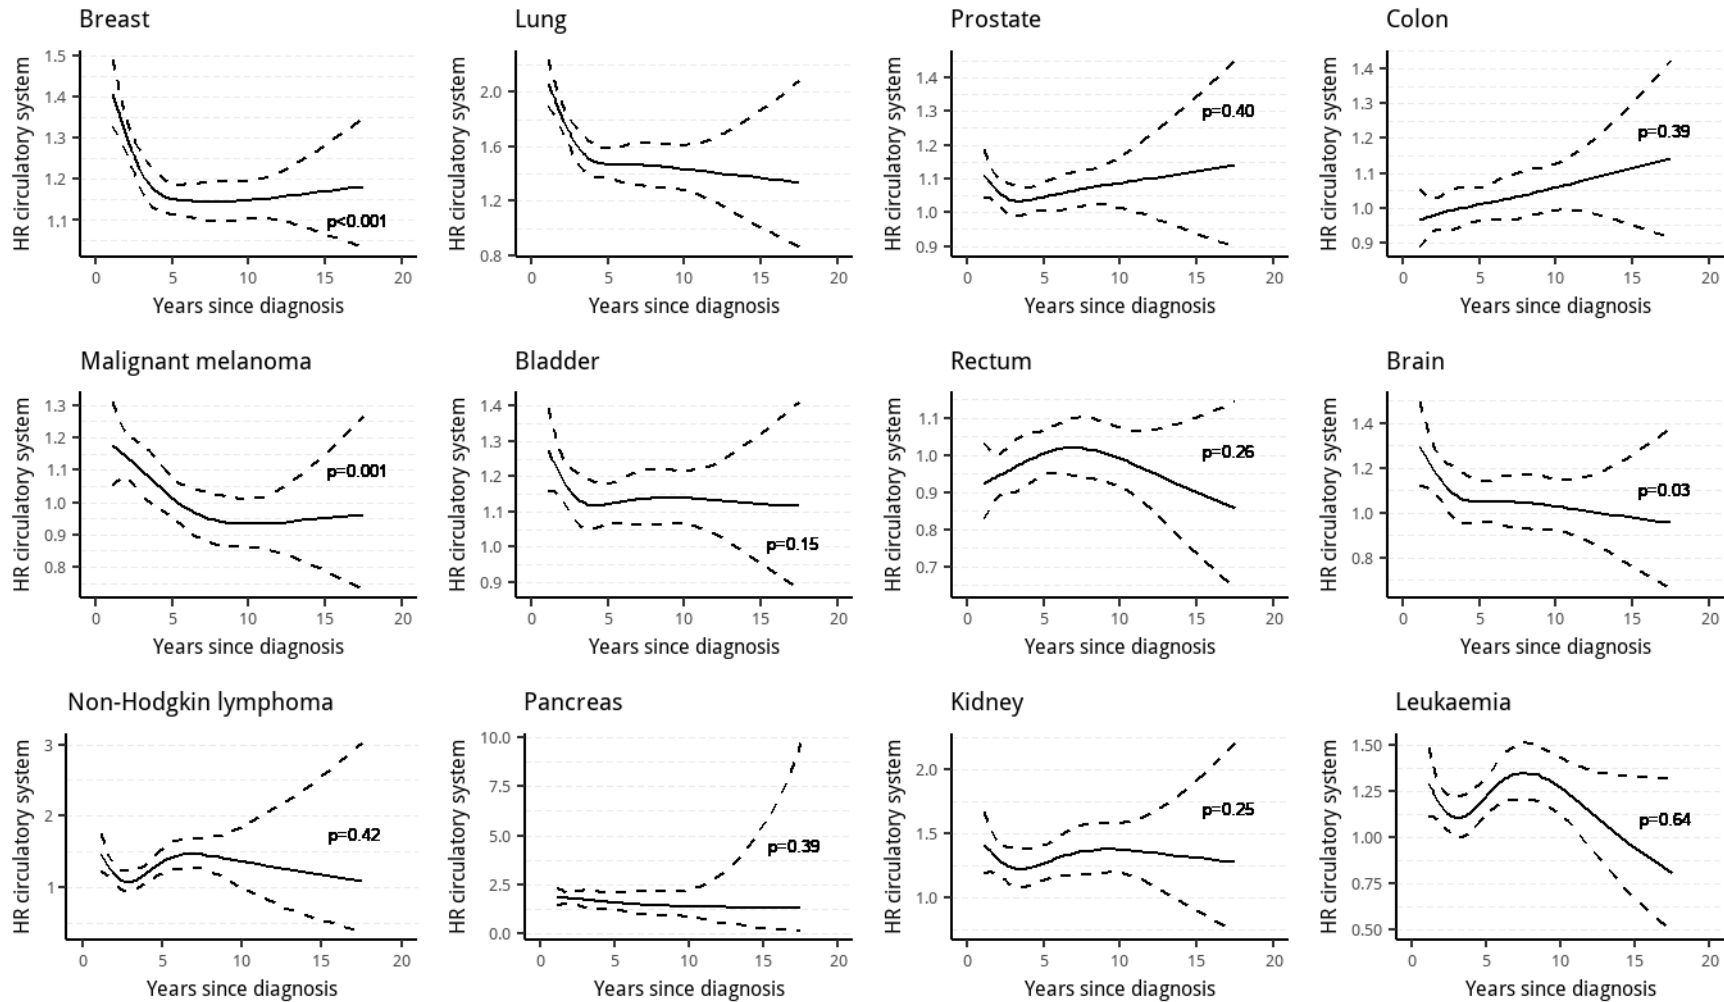

**eFigure 11.** Adjusted HRs and 95% CIs for hospitalization of survivors of the 12 most frequent cancer types for diseases of the respiratory system as compared with matched cancer-free comparison people. Solid lines represent HRs and the two dashed lines 95% CIs. Note that the y-axes are not the same. *P* values for test of hypothesis of constant HR over time.

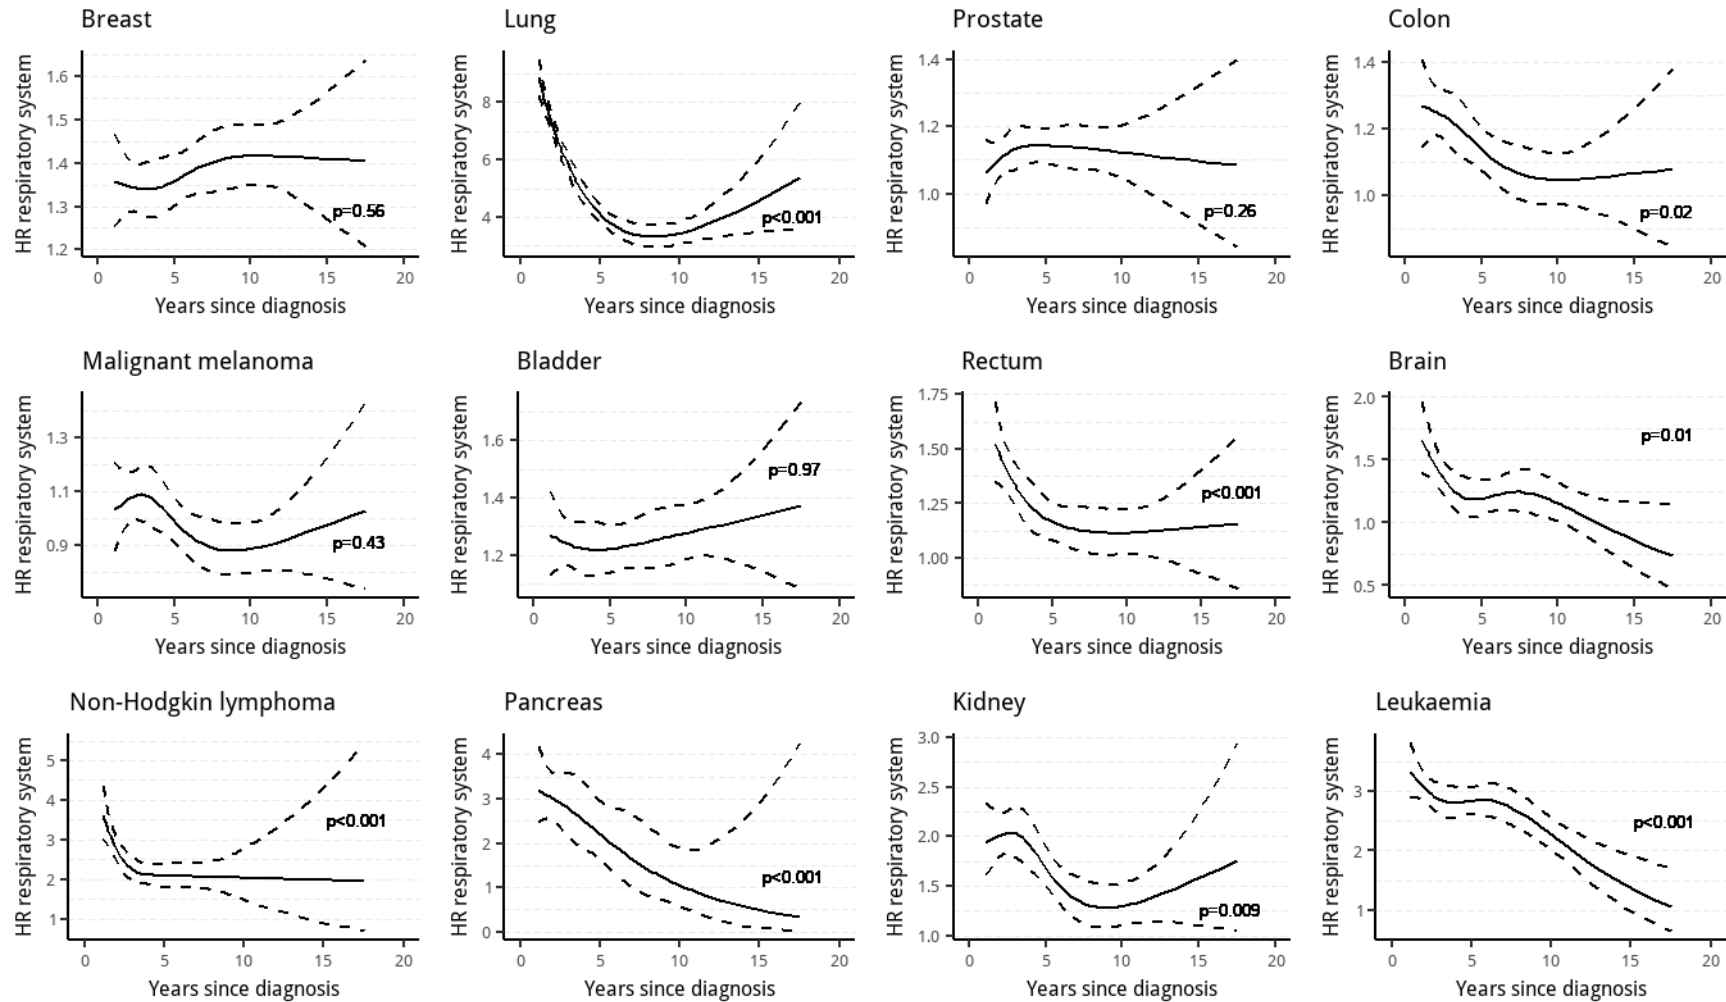

**eFigure 12.** Adjusted HRs and 95% CIs for hospitalization of survivors of the 12 most frequent cancer types for diseases of the digestive system as compared with matched cancer-free comparison people. Solid lines represent HRs and the two dashed lines 95% CIs. Note that the y-axes are not the same. *P* values for test of hypothesis of constant HR over time.

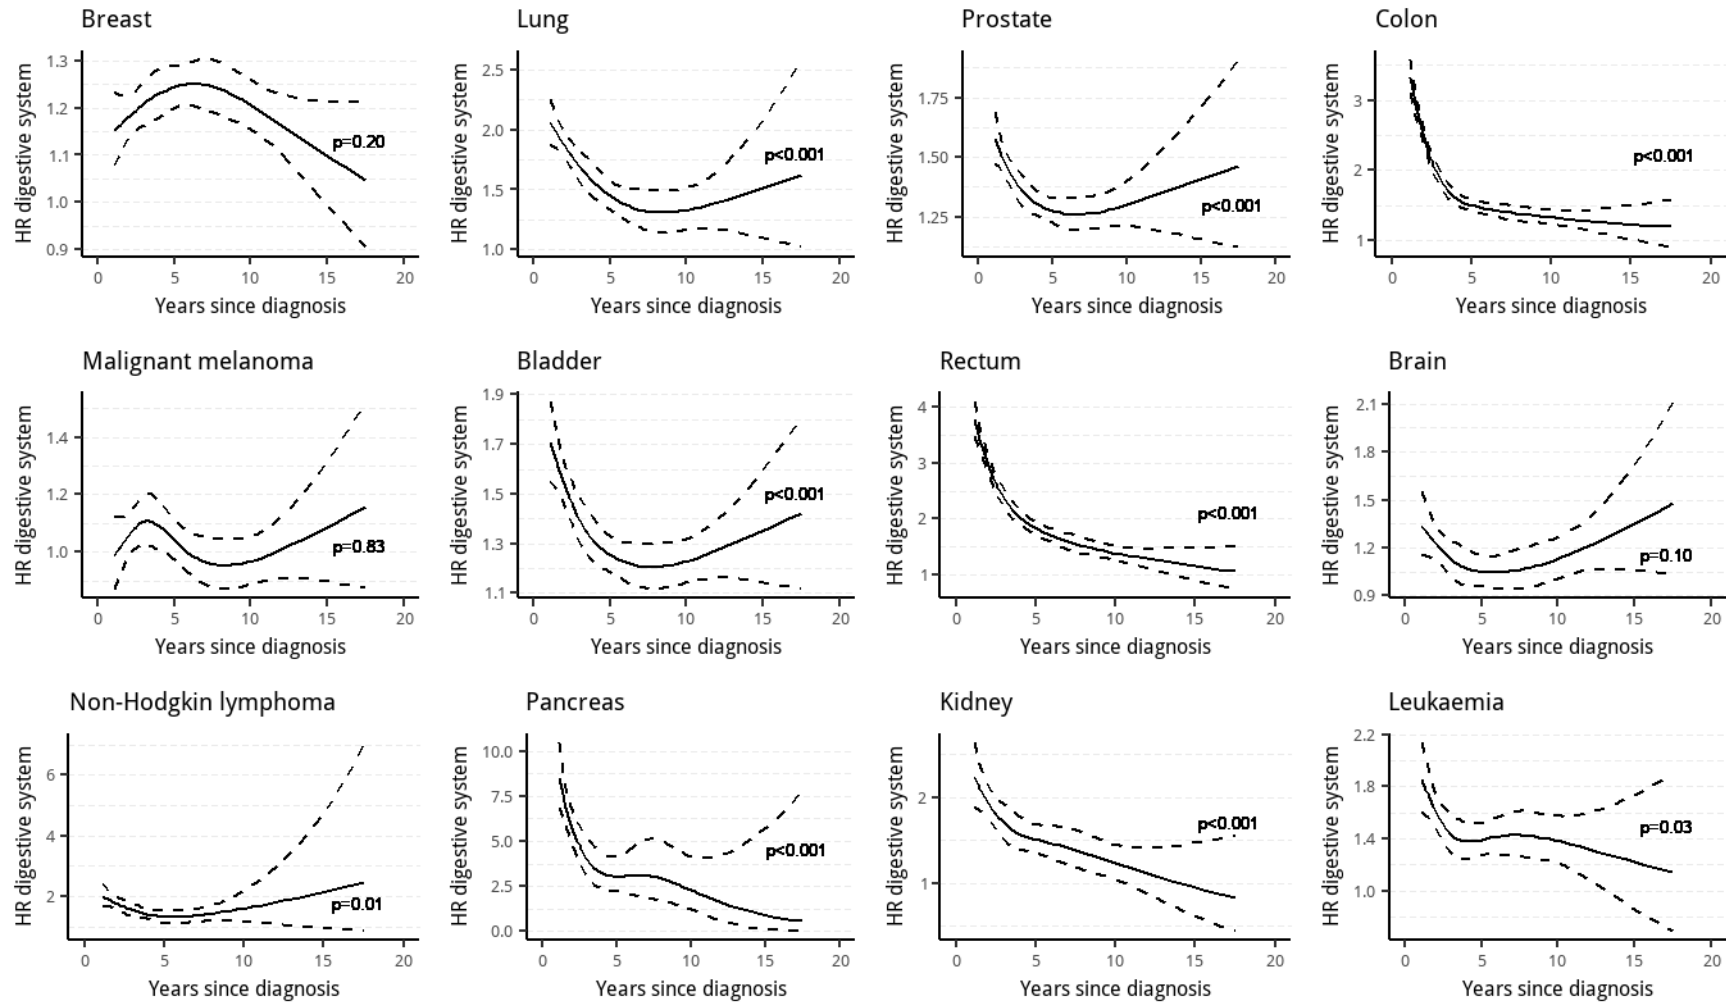

**eFigure 13.** Adjusted HRs and 95% CIs for hospitalization of survivors of the 12 most frequent cancer types for diseases of the skin and subcutaneous tissue as compared with matched cancer-free comparison people. Solid lines represent HRs and the two dashed lines 95% CIs. Note that the y-axes are not the same. *P* values for test of hypothesis of constant HR over time.

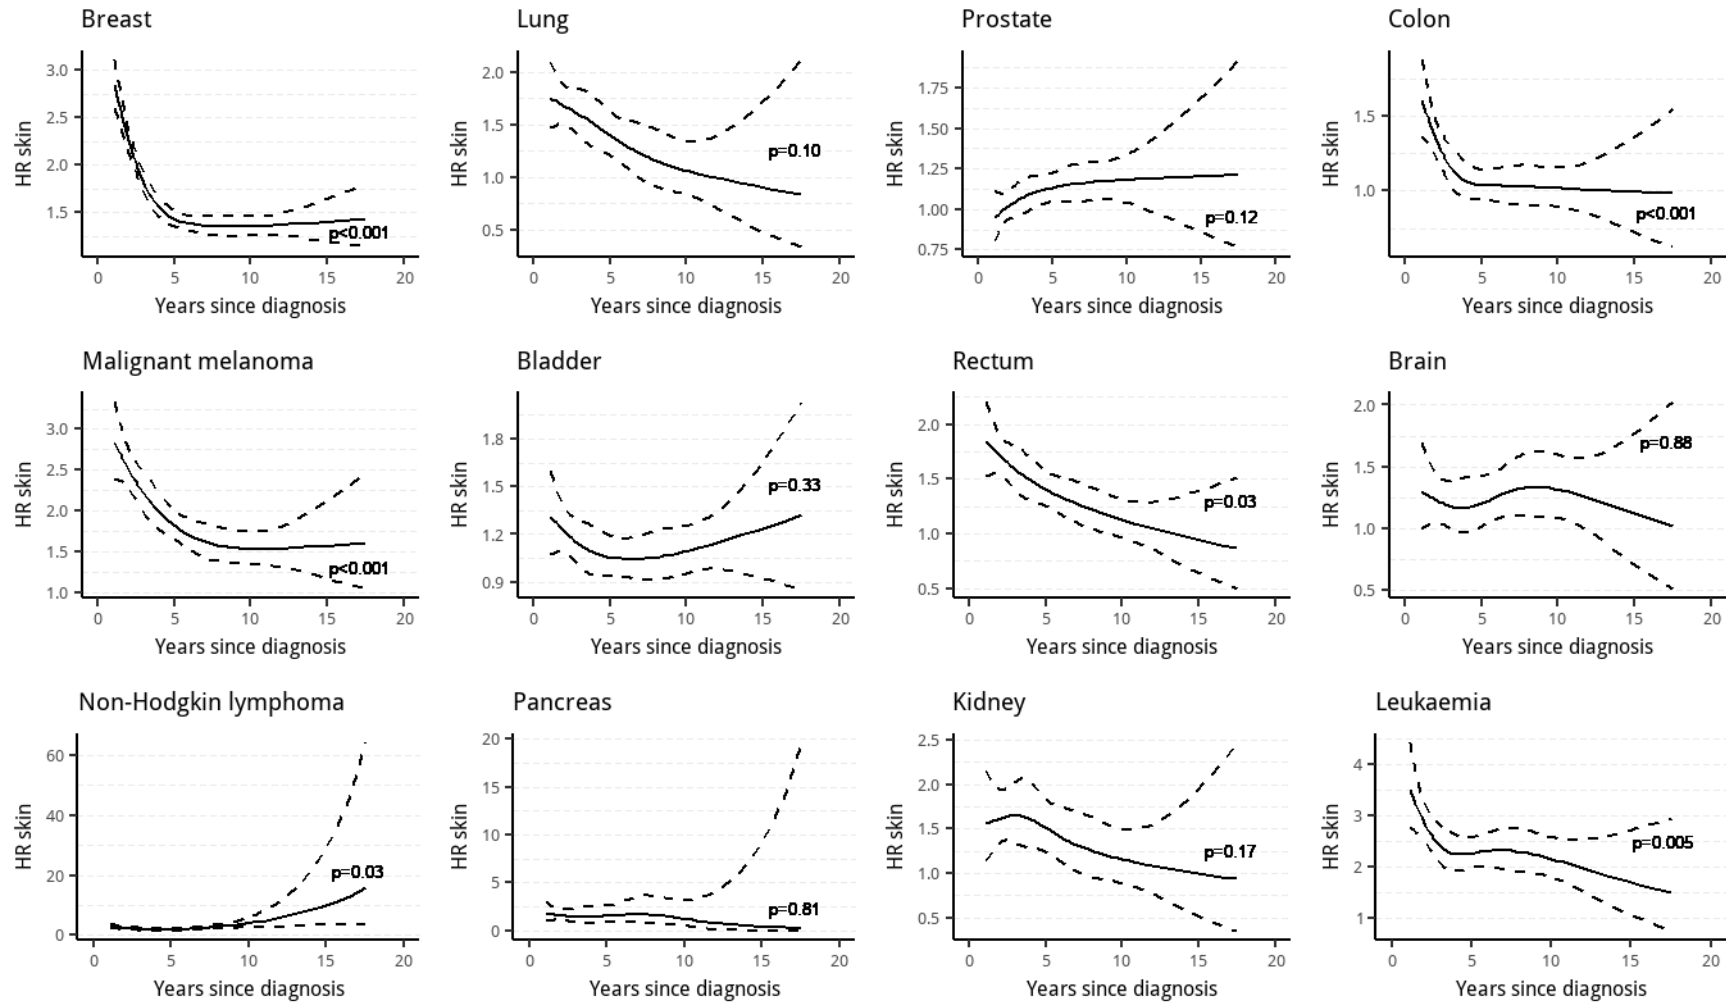



**eFigure 14.** Adjusted HRs and 95% CIs for hospitalization of survivors of the 12 most frequent cancer types for diseases of the musculoskeletal system and connective tissue as compared with matched cancer-free comparison people. Solid lines represent HRs and the two dashed lines 95% CIs. Note that the y-axes are not the same. *P* values for test of hypothesis of constant HR over time.

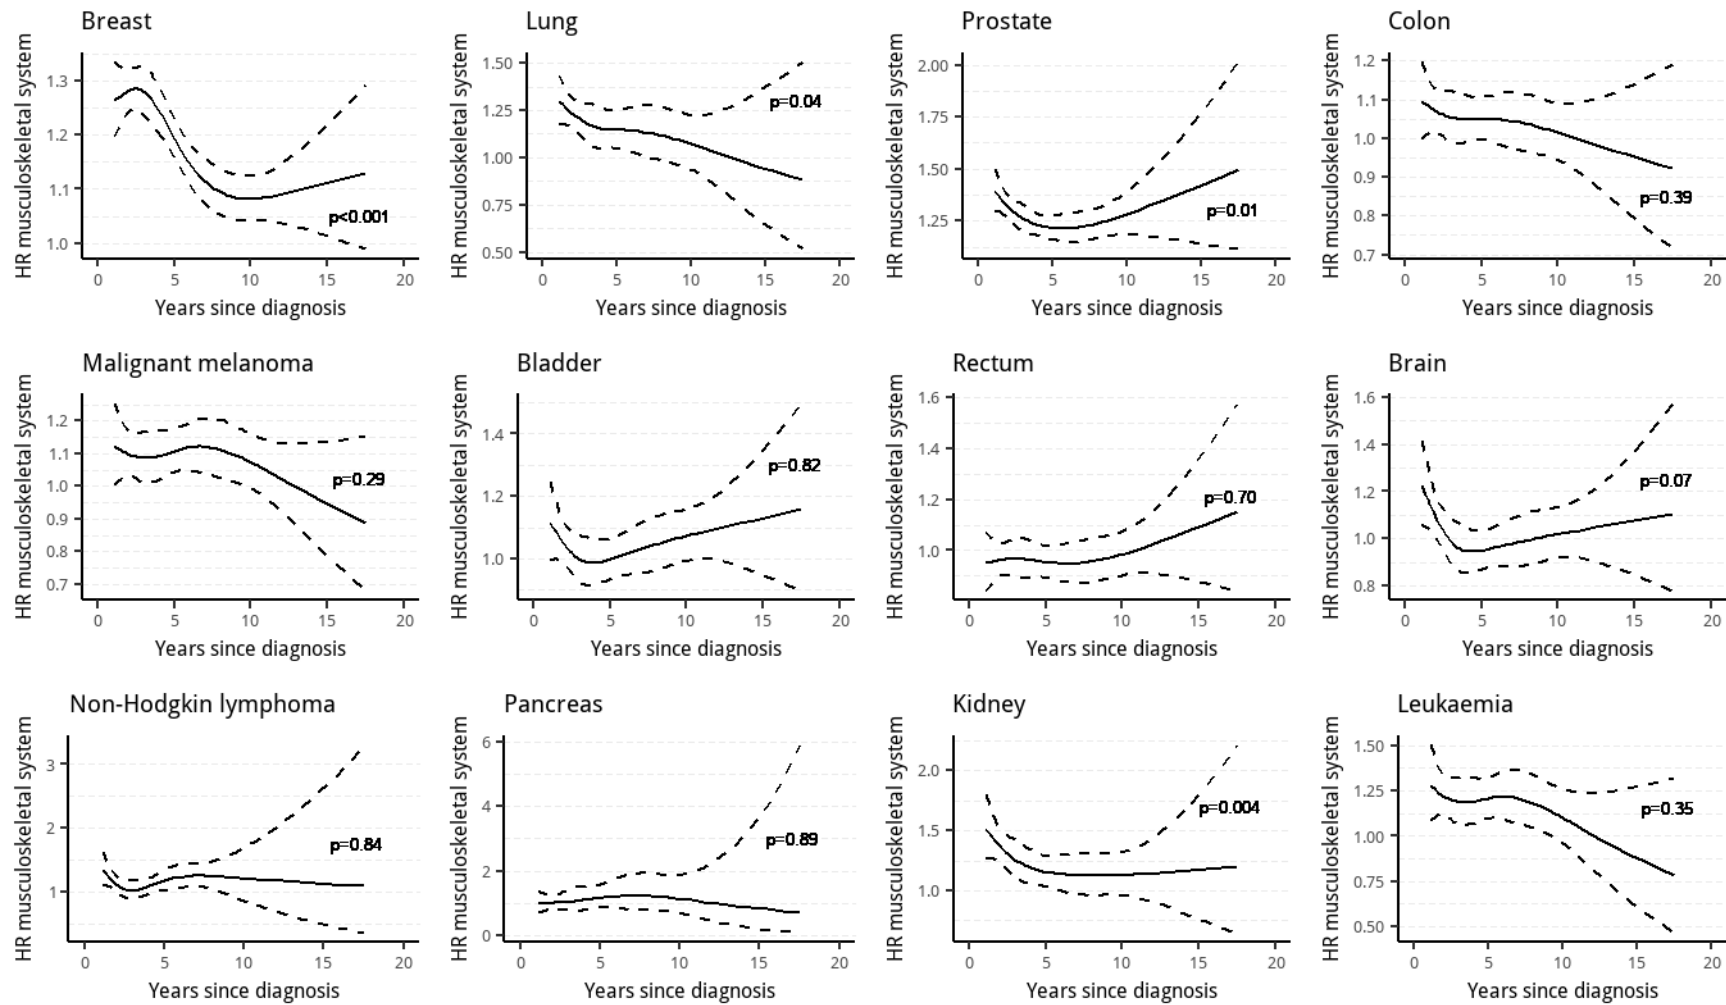

**eFigure 15.** Adjusted HRs and 95% CIs for hospitalization of survivors of the 12 most frequent cancer types for diseases of the genitourinary system as compared with matched cancer-free comparison people. Solid lines represent HRs and the two dashed lines 95% CIs. Note that the y-axes are not the same. *P* values for test of hypothesis of constant HR over time.

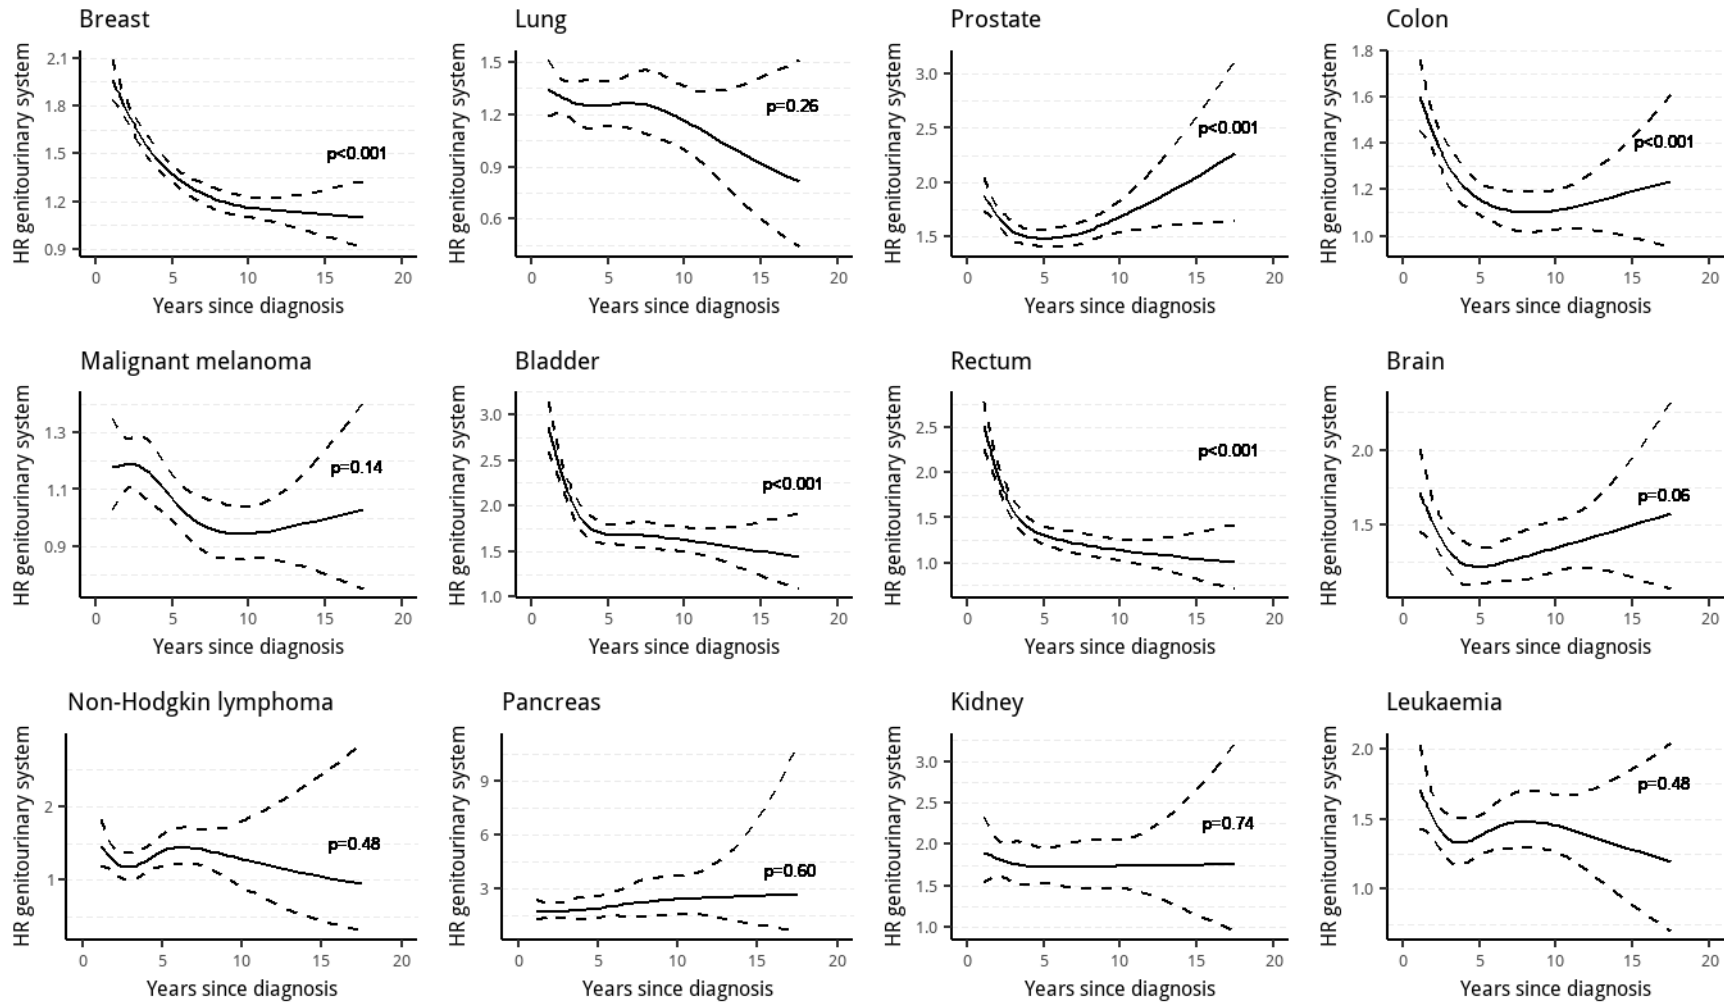

Supplement: jamaoncol-e187192-s001.pdf [file jamaoncol-e187192-s001.pdf]
